# Supplementary material for: Copper with an atomic-scale spacing for efficient electrocatalytic co-reduction of carbon dioxide and nitrate to urea
Source: Royal Society of Chemistry journal article supplement (doi:10.1039/d3ee00008g), 2023-01-01
Supplement: d3ee00008g1.pdf [file d3ee00008g1.pdf]

## Supplementary Information

### Copper with an atomic-scale spacing for efficient electrocatalytic co-reduction of carbon dioxide and nitrate to urea

Seokmin Shin<sup>a</sup>, Siraj Sultan<sup>a</sup>, Zong-Xian Chen<sup>b</sup>, Hojeong Lee<sup>a</sup>, Hansaem Choi<sup>a</sup>, Tae-Ung Wi<sup>c</sup>, Changhyun Park<sup>a</sup>, Taewon Kim<sup>a</sup>, Chanhee Lee<sup>a</sup>, Jihong Jeong<sup>a</sup>, Hyeju Shin<sup>d</sup>, Tae-Hee Kim<sup>d</sup>, HyungKuk Ju<sup>e</sup>, Hyung Chul Yoon<sup>e</sup>, Hyun-Kon Song<sup>\*a</sup>, Hyun-Wook Lee<sup>\*a</sup>, Mu-Jeng Cheng<sup>\*b</sup>, Youngkook Kwon<sup>\*a,f</sup>

<sup>a</sup>School of Energy and Chemical Engineering, UNIST, Ulsan 44919, Korea.

<sup>b</sup>Department of Chemistry, National Cheng Kung University, Tainan 701, Taiwan.

<sup>c</sup>Department of Chemical and Biomolecular Engineering, Rice University, Houston, Texas, 77005, United States.

<sup>d</sup>Ulsan Advanced Energy Technology R&D Center, Korea Institute of Energy Research (KIER), Ulsan 44776, Korea.

<sup>e</sup>Climate Change Research Division, Korea Institute of Energy Research (KIER), Daejeon 34129, Korea

<sup>f</sup>Graduate School of Carbon Neutrality, UNIST, Ulsan 44919, Korea

\*Correspondence and requests for materials should be addressed to Y.K. (ykwon@unist.ac.kr).

## Methods

### Synthesis of $d_s$ in $\text{Cu}_2\text{O}$

A bare  $\text{Cu}_2\text{O}$  nanoparticle (< 50 nm; Sigma-Aldrich) was lithiated and then delithiated to develop inter-particle spacings within the nanoparticles. 2032-coin cells and the monolayer pouch-type cells were assembled for lithiating and delithiating  $\text{Cu}_2\text{O}$ . A polyethylene separator (NH716, Asahi) was placed between a  $\text{Cu}_2\text{O}$ -loaded electrode and a Li metal foil. A  $\text{Cu}_2\text{O}$ -containing slurry loaded on a copper foil by  $7.0 \text{ mg cm}^{-2}$  was dried for 24 h in a vacuum at  $110^\circ\text{C}$ . The slurry was prepared by mixing  $\text{Cu}_2\text{O}$  and PVdF (solef5130, Solvay) at 9:1 wt% in N-methyl-2-pyrrolidinone (NMP; Daejung). 1 M  $\text{LiPF}_6$  in a mixture of ethylene carbonate (EC) and ethyl methyl carbonate (EMC) at a volume ratio of 3:7 was used as the electrolyte ( $40\mu\text{l}$  for coin-type cell and  $300\mu\text{l}$  for pouch-type cell). An electrode was cut-off in 16 pi or  $3 \times 4.5 \text{ cm}^2$ . Ar-filled glove box (Mbraun; <0.1 ppm  $\text{O}_2$  and  $\text{H}_2\text{O}$ ) was used for coin-cells assembling and electrolytes preparation. Temperature-controlled dry room was used for pouch-type cells assembly. A  $\text{Cu}_2\text{O}$  electrode was lithiated at 0.1C (C-rate, equivalent to  $0.38 \text{ mA cm}^{-2}$  up to 0.85 V, 0.7 Vand 0 V (0.01 V) with respect to the lithium metal counter electrode. For the delithiation step, same C-rate up to  $3.0 V_{\text{Li}}$  was applied. The samples were washed sequentially with NMP, ethanol, acetone, and 0.05 M of acetic acid to remove residual lithium sources such as  $\text{Li}_2\text{O}$ . Samples were rinsed with DI water between each washing process. The washing process was repeated a total of 3 times to finally prepare the catalyst.

### Nanochannel identification

The atomic-scale spacings ( $d_s$ ) in the lithiated and delithiated  $\text{Cu}_2\text{O}$  samples were measured through an *in-situ* and *ex-situ* transmission electron microscope (TEM) analysis. The real-time data was acquired by using a TEM (Tecnai G2 F20 X-TWIN, FEI) with an acceleration voltage of 200 kV and an *in-situ* holder (Dual-Probe STM-TEM *in-situ* holder, Nanofactory Instruments) with two electrodes. One was a Cu tip with  $\text{Cu}_2\text{O}$  nanoparticles as a working electrode and the other was a tungsten tip with lithium metal as a counter and reference electrode. On the lithium metal surface,  $\text{Li}_2\text{O}$  occurs due to air exposure for several seconds, which acts as a solid electrolyte. Lithiation was performed by applying a 0.5 V bias between the two electrodes.

*Ex-situ* TEM analysis was performed using a high-resolution transmission electron microscope (JEM-2100F, HRTEM, and JEOL). Bright and dark field images for measuring the gap at each state were performed by a scanning TEM (JEM-2100F, STEM, and JEOL) at the acceleration voltage of 200 kV.

### Material identification

X-ray diffraction patterns (XRD), X-ray photoelectron spectra (XPS), and X-ray adsorption spectra (XAS) were obtained to identify the material composition of nanochannel  $\text{Cu}_2\text{O}$  experiencing lithiation and then de-lithiation. XRD: Rigaku D/MAX2500V/PC at 40 kV and 200 mA copper rotating anode. XPS: XPS system by Thermo Fisher with  $\text{Al K}\alpha$  ( $h\nu = 1486.6 \text{ eV}$ ). XAS: The beamline 6D in Pohang Accelerator Laboratory (PAL) at 3.5 GeV with 400 mA by transmittance signals for *ex-situ* analysis and fluorescence signals for *in-situ* analysis.

### Electrochemical measurements

The electrochemical experiments including cyclic voltammograms (CV), linear sweep voltammograms (LSV), and chronopotentiometry were conducted with a potentiostat (VMP3 and VSP-300, BioLogic). For the electrochemical performance evaluation of our synthesized catalysts, we deposited the ink of the catalyst with a loading density of  $0.5 \text{ mg cm}^{-2}$  on the gas diffusion electrode (GDE, Sigracet, Fuel cell store) and used it as a cathode part in a gas-tight flow-type cell.  $\text{CO}_2$  gas as reactant was introduced to the gas chamber of the cell at the rate of  $20 \text{ mL min}^{-1}$  while the electrolyte was circulated at a speed of  $8 \text{ mL min}^{-1}$ . A dimensionally stable anode (DSA, HS materials) was used as an anode while  $\text{Hg/HgO}$  (1 M KOH) was used as a reference electrode. To avoid the re-oxidation of products at the anode, the working and reference electrodes were separated from the anodic chamber through an anion exchange membrane (Sustanion, Dioxide Materials). All the potentials reported in this work were converted into reversible hydrogen electrode (E vs. RHE) with the equation of  $E_{\text{RHE}} = E_{\text{Hg/HgO}} + E_{\text{Hg/HgO}}^0 + 0.059 \cdot \text{pH}$ . LSVs and CPs are also IR-corrected.

### Product analysis

The gaseous products such as ethylene, carbon monoxide, methane and hydrogen were analyzed quantitatively and qualitatively through online gas chromatography (GC, iGC 7200A, DS Science). The outlet of the gaseous chamber in the electrochemical cell was directly connected to the GC and repeatedly injected into GC during the operation (time interval of 20 min during 1.5 h chronoamperometry or chronopotentiometry experiments).

The C-N coupled liquid products (Urea, acetamide and formamide) was analyzed using  $^1\text{H-NMR}$  analysis with 400 MHz Fourier transform nuclear magnetic resonance (400 MHz FT-NMR, AVANCE III HD, Bruker). The carbon-containing liquid products (Formate, methanol, acetate, and ethanol) were analyzed through high-performance liquid chromatography (HPLC, 1260 Infinity II, Agilent Technologies). Nucleogel Sugar 810 column and a refractive index detector equipped with 5 mM sulfuric acid were used as an eluent. The possible liquid by-products such as ammonia and hydroxylamine during the  $\text{CR-CO}_2/\text{NO}_3^-$  or in sole  $\text{NO}_3^-$ RR were analyzed by ion chromatography (Thermo Scientific Dionex Aquion and AS-DV Autosampler) equipped with Dionex™ IonPac™ CS12A column. 4 mM  $\text{HNO}_3$  solution was used as an eluent. For all the liquid products, Faradaic efficiency (%) was calculated by

measuring the charge required to produce the analyzed product concentration divided by the total charge passed during the electrolysis.

### Calculation of FE and urea yield rate

The urea yield rate and FE of products are calculated by the following equations:

$$Urea\ yield\ rate\ (g\ h^{-1}\ mg_{cat}^{-1}) = \frac{C_{urea}(g\ mL^{-1}) \times V(mL)}{t\ (h) \times m_{cat}(mg)} \quad (1)$$

$$FE\ (\%) = \frac{n_e \times n_{product}(mol) \times F(C\ mol^{-1})}{Q\ (C)} \times 100\ (\%) \quad (2)$$

Where  $C_{urea}$  and  $V$  are the measured urea concentration and electrolyte volume.  $m_{cat}$  is the amount of catalyst loading which is  $0.5\ mg\ cm^{-2}$  in this work.  $F$  is the Faraday constant ( $96,485\ C\ mol^{-1}$ ) and  $Q$  is the total charge during the reaction.  $n_e$  is the number of electron transfers for each reaction and  $n_{product}$  is the mol of each product.

### In-situ Raman spectroscopy measurements

*In-situ* Raman spectroscopy measurements were performed using XperRAM S confocal microscope (objective lens with 50 times magnification, 532 nm laser) in a custom-made flow-type Raman cell with 1 M KOH electrolyte. As-prepared catalysts treated by the surface-enhanced Raman spectroscopy (SERS) method were deposited on GDE and used as working electrodes, while a Ni-Fe-Mo and an Ag/AgCl (saturated with KCl) were used as counter and reference electrodes, respectively. *In-situ* Raman spectroscopy measurements during  $CO_2$  &  $NO_3^-$  co-reduction reaction (CR- $CO_2/NO_3^-$ ) were performed with 1 M KOH added with 0.1 M  $KHCO_3$  electrolyte and  $CO_2$  gas was continuously supplied to the gas chamber during the reaction.

### $CO_2$ -Temperature programmed desorption ( $CO_2$ -TPD) measurements

To perform  $CO_2$ -TPD, 50 mg of catalyst was calcined in Helium (He) at  $200\ ^\circ C$  for 1 hour in a quartz tube. The sample was then cooled to  $50\ ^\circ C$  to adsorb  $CO_2$  for 30 min. The system was purged with He for 30 min to remove weakly adsorbed species. The TCD signal was stabilized for 1 hour, and the TPD program started by heating the sample to  $600\ ^\circ C$  at a rate of  $10\ ^\circ C/min$ .

### Computational details

PBE-D3 combined with projector augmented wave pseudopotentials (400 eV energy cutoff) as implemented in the Vienna ab initio Simulation Package (VASP) was used for all DFT calculations. We used the Gaussian-smearing method ( $k_B T = 0.1\ eV$  for slabs and  $0.01\ eV$  for  $CO_2$ ) to accelerate SCF convergence, and the electronic energies at  $T = 0\ K$  were obtained through extrapolation. For slab calculations, a Monkhorst-Pack k-point net of  $3 \times 3 \times 1$  was used to sample the reciprocal space, whereas only the gamma point was considered for gaseous  $CO_2$ . Spin-polarized DFT was used for all calculations.

The bare copper surface was modeled using Cu(111) with three  $3 \times 3$  layers cleaved from bulk face-centered cubic copper with a cell parameter of  $3.615\ \text{\AA}$ . During geometric optimizations, the top two layers and surface-bound species were allowed to relax, and the bottom layer was fixed in its bulk position. Copper with an atomic gap was modelled using two Cu(111) surfaces each composed of three  $3 \times 3$  layers. During geometric optimizations, the bottom layer of the lower surface and the top layer of the up surface were fixed in their bulk position, whereas the rest of the model including the adsorbates was allowed to relax. A vacuum of at least  $30\ \text{\AA}$  was introduced to the slab models to avoid interactions between two adjacent cells along the z-direction. To compute the energy of  $CO_2$ , a cubic simulation box with a volume of  $20 \times 20 \times 20\ \text{\AA}^3$  was employed.

The transition states were located using the dimer method and further verified by vibrational frequency calculations where only one imaginary frequency was present. For each coupling of  $*CO/*COOH$  with the  $N_1$  species, two transition states were located. One has both  $C_1$  and  $N_1$  adsorbates on the lower surface, whereas the other has one adsorbate on the lower surface and the other on the upper surface. Our calculations showed that the former one is more facile.

The free energies of the slab systems were calculated based on the following equation:

$$G = E_{elec} + ZPVE + \sum_v \frac{hv}{e^{hv/k_B T} - 1} - T \times S_{vib} \quad (3)$$

The vibrational frequencies ( $h\nu$ ) were only evaluated for adsorbates by evaluating the partial Hessian matrix via the finite difference approach to obtain the zero-point vibrational energy (ZPVE) and vibrational entropy ( $S_{vib}$ ). The free energies of  $\text{CO}_2$  were calculated using the following equation:

$$G = E_{elec} + ZPVE + \sum_v \frac{h\nu}{e^{h\nu/k_B T} - 1} + \frac{n}{2} k_B T - T \times (S_{trans} + S_{rot} + S_{vib}) \quad (4)$$

where  $n$  is seven.  $E_{elect}$  was obtained using VASP, and the ZPVE, a vibrational component of the internal energy,  $S_{vib}$ ,  $S_{rot}$ , and  $S_{trans}$  were obtained using Gaussian09 at the PBE-D3/6-311++G\*\* level of theory.

## Supplementary Notes

### Lithiation and De-lithiation process during synthesis of $d_s$ in $\text{Cu}_2\text{O}$

Oxide-based materials, including  $\text{Cu}_2\text{O}$ , are categorized as conversion materials in the field of lithium-ion battery applications and generally undergo the following reaction:  $(\text{MO} + 2\text{Li} + 2\text{e}^- \rightarrow \text{M} + \text{Li}_2\text{O})$  - (1)

Moreover,  $\text{Li}_2\text{O}$  has low chemical activity and is known to decompose easily. In conventional lithium-ion battery systems, conversion materials typically experience a change in particle size to form nanoparticles upon lithiation. For  $\text{Cu}_2\text{O}$ , this conversion, or lithiation, occurs through the following reaction:  $(\text{Cu}_2\text{O} + 2\text{Li}^+ + 2\text{e}^- \rightarrow 2\text{Cu} + \text{Li}_2\text{O})$  - (2)

The changes in morphology and lattice during the corresponding lithiation process were presented with detailed explanations in the main text (Fig. 2 and Fig. S4, 7, etc.). However, in the de-lithiation process (step IV in our manuscript), the above reaction (2) is simply reversed  $(\text{Cu}_2\text{O} + 2\text{Li}^+ + 2\text{e}^- \leftarrow 2\text{Cu} + \text{Li}_2\text{O})$ , during this de-lithiation step, the metallic Cu is oxidized back to  $\text{Cu}_2\text{O}$ . From HR-TEM and STEM analysis we note that the de-lithiation step do not change the particle size (the particle size is almost similar to that of lithiated Cu catalysts) but only increase the  $d_s$  between the copper facets (Fig. S7). Therefore, the catalyst that underwent the de-lithiation process is mainly composed of  $\text{Cu}_2\text{O}$ , with some unoxidized Cu and  $\text{Li}_2\text{O}$ . After the de-lithiation process, we removed  $\text{Li}_2\text{O}$  through a washing process, analysed the catalyst, and referred to it as  $15\text{\AA}$ -Cu.

When considering the formation of  $d_s$ , lithiation and de-lithiation tend to increase in accordance with the degree of lithiation (3 Å, 6 Å, and 12 Å) and through de-lithiation (15 Å). Therefore, in this study, lithiation and de-lithiation are considered as an integrated process in the goal of creating  $d_s$ . Although the degree of mixing of oxide and metallic state may differ depending on the lithiation/de-lithiation process, the corresponding electronic state does not impact the morphology and formation of  $d_s$ . Furthermore, all catalysts are reduced to metallic Cu during CR- $\text{CO}_2/\text{NO}_3^-$ . Moreover, adopting this perspective, the experimental analysis of catalysts  $6\text{\AA}$ -Cu and  $15\text{\AA}$ -Cu, which respectively underwent lithiation and de-lithiation, revealed that the components of each catalyst were not significantly different. However, a significant disparity was observed in the electrochemical performance, leading us to conduct analysis of chemical adsorption of  $\text{CO}_2$  behavior. Hence, we conducted  $\text{CO}_2$  temperature programmed desorption ( $\text{CO}_2$ -TPD) experiments and present the results in Fig. S31 (ESI). The  $\text{CO}_2$  desorption peak intensity showed a tendency in the order of  $6\text{\AA}$ -Cu >  $15\text{\AA}$ -Cu > Cu, and the peak location was in the order of  $6\text{\AA}$ -Cu (281.6 °C) >  $15\text{\AA}$ -Cu (276.3 °C) > Cu (268.2 °C). This indicated that  $6\text{\AA}$ -Cu had a stronger degree of chemisorption and more  $\text{CO}_2$  adsorption capacity.

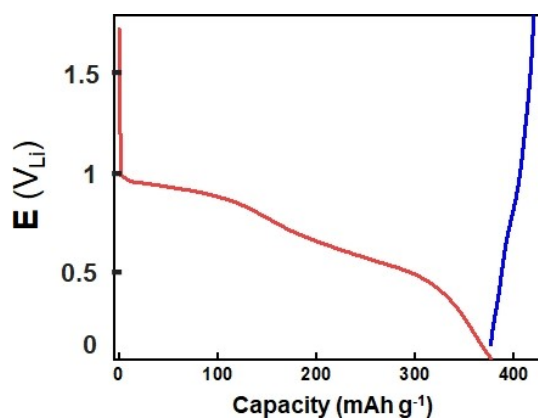

**Fig. S1. Voltage profile of lithiation and delithiation of  $\text{Cu}_2\text{O}$ .** Voltage profile was plotted with corresponding capacity during lithiation and delithiation. A voltage profile provided in Fig. 1a is normalized based on this voltage profile by dividing specific capacity of each lithiation and de lithiation step to present x-axis as a ratio.

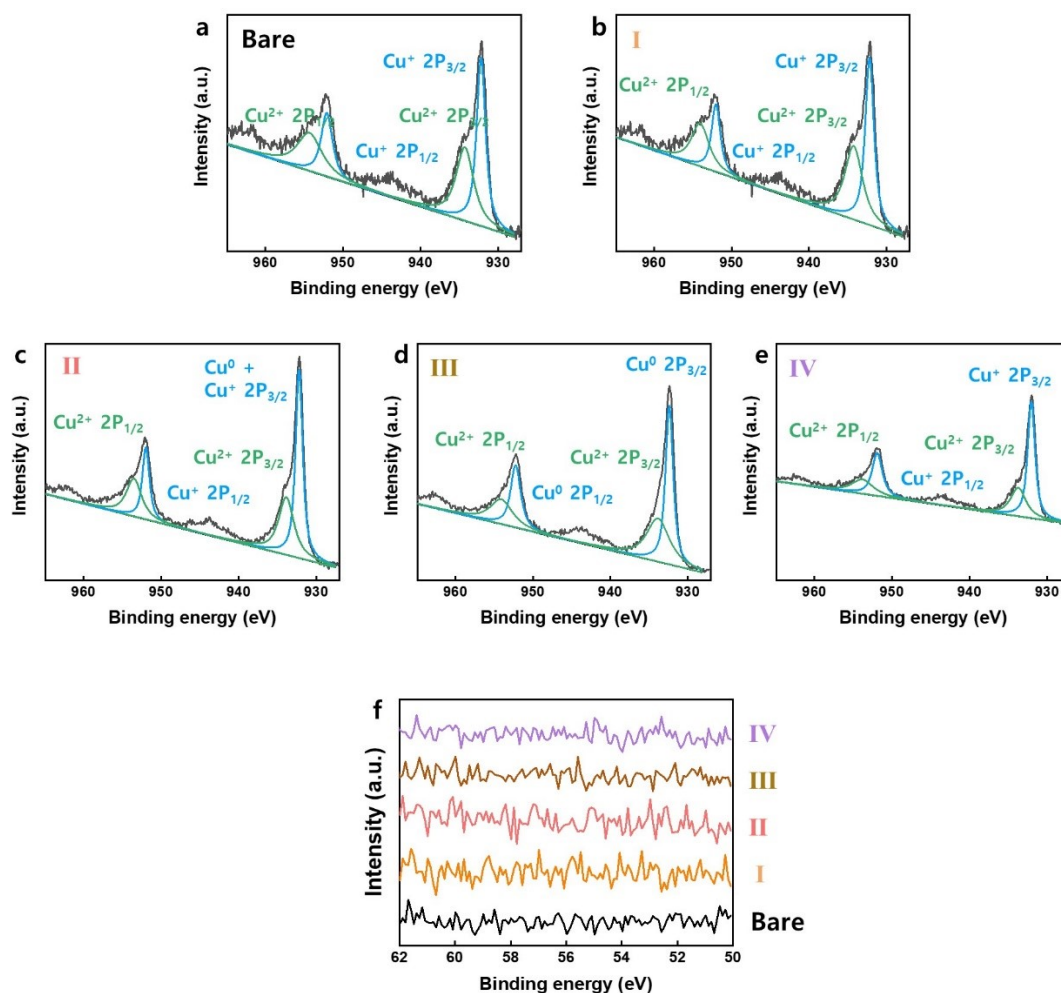

**Fig. S2. X-ray-photoelectron-spectroscopic (XPS) spectra analysis of bare  $\text{Cu}_2\text{O}$  and its sisters with atomic scale spacings.** (a-e) Copper elements of  $\text{Cu}_2\text{O}$  catalysts in Cu 2p XPS spectra. (f) Lithium elements of  $\text{Cu}_2\text{O}$  catalysts in Li 1s XPS spectra.

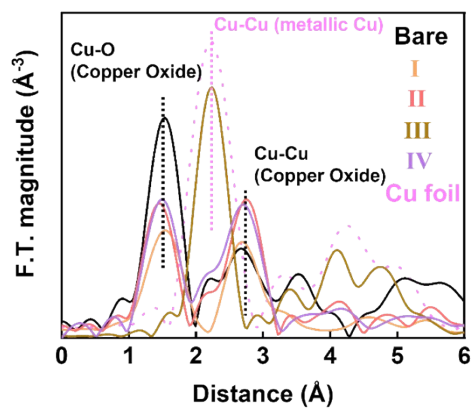

Fig. S3. Radial distances between Cu and its surrounding elements. *Ex-situ* extended X-ray absorption fine structure spectra analysis was conducted.

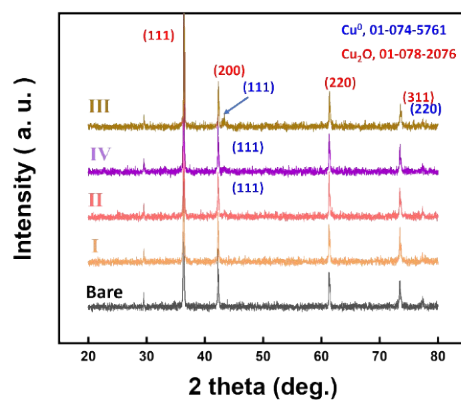

Fig. S4. Crystallographic identification of bare Cu<sub>2</sub>O and samples with lithiation in powder X-ray diffraction (PXRD) patterns.



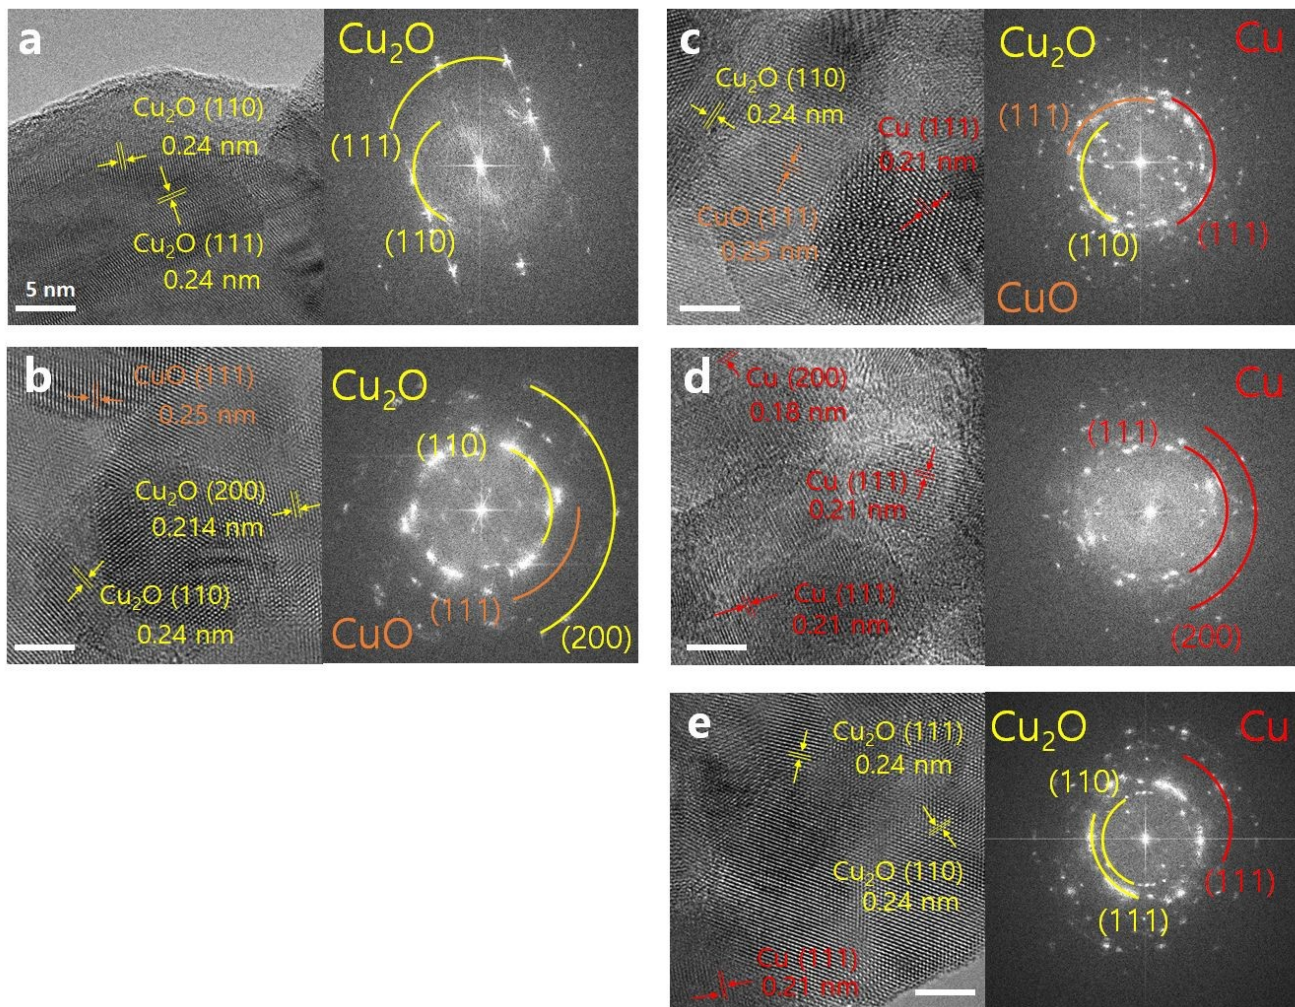

**Fig. S5. HR-TEM images with FFT analysis.** Lattices and facets were analysed on TEM images with an inset of FFT. (a) Bare  $\text{Cu}_2\text{O}$ , (b) Step I, (c) Step II, (d) Step III, and (e) step IV. We note that all the samples are chemically de-lithiated and  $\text{Cu}$  lattices are observed in the HR-TEM image of (a-c) originating from the easily oxidative characteristic of  $\text{Cu}_2\text{O}$  to  $\text{Cu}$ .

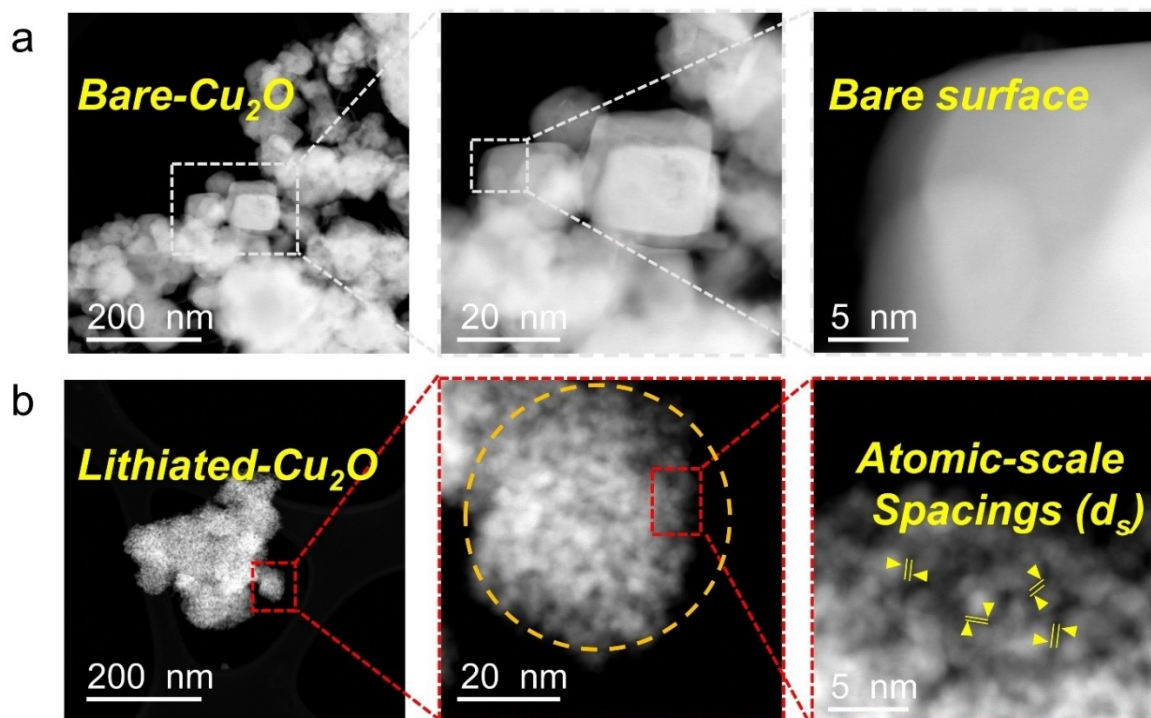

**Fig. S6. Scanning transmission electron microscopy (STEM) analysis of Cu<sub>2</sub>O.** (a) STEM images of bare Cu<sub>2</sub>O. Enlarged images from low to high magnification were pointed with white boxes and lines. (b) STEM images of lithiated Cu<sub>2</sub>O (atomic-scale spacings highlighted in an orange circle and yellow parallel lines with points).

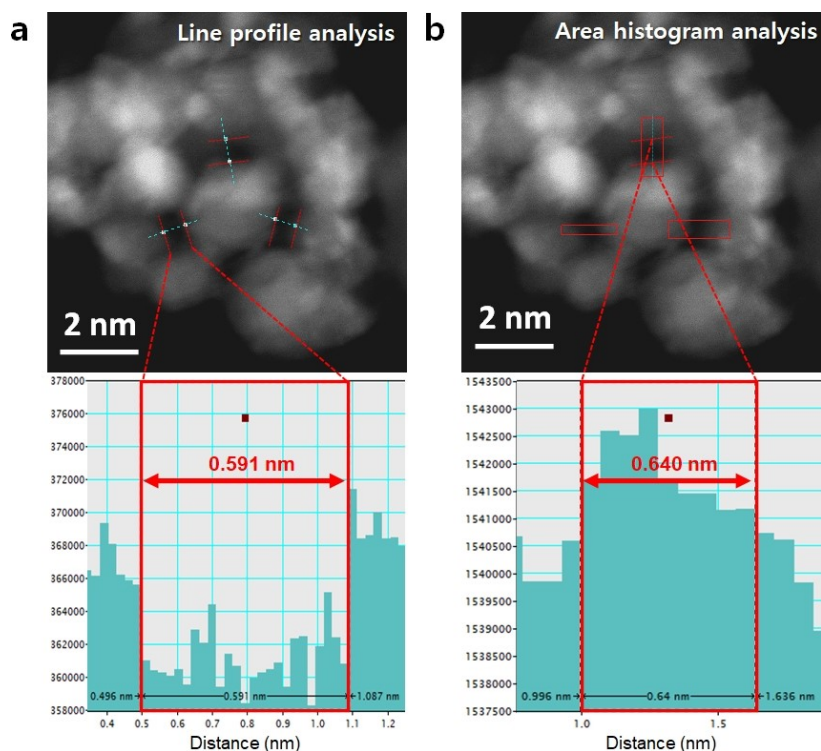

**Fig. S7. How to measure sizes of atomic-scale spacings of Cu<sub>2</sub>O with  $d_s$  samples in STEM images.** Two representatives are demonstrated: a line profile analysis and an area profile analysis. (a) Atomic scale spacing measurement in conversion reaction derived Cu<sub>2</sub>O nanoparticles. (b) Atomic scale spacing measurement double-checked from area histogram pixel analysis to convert into line profile.



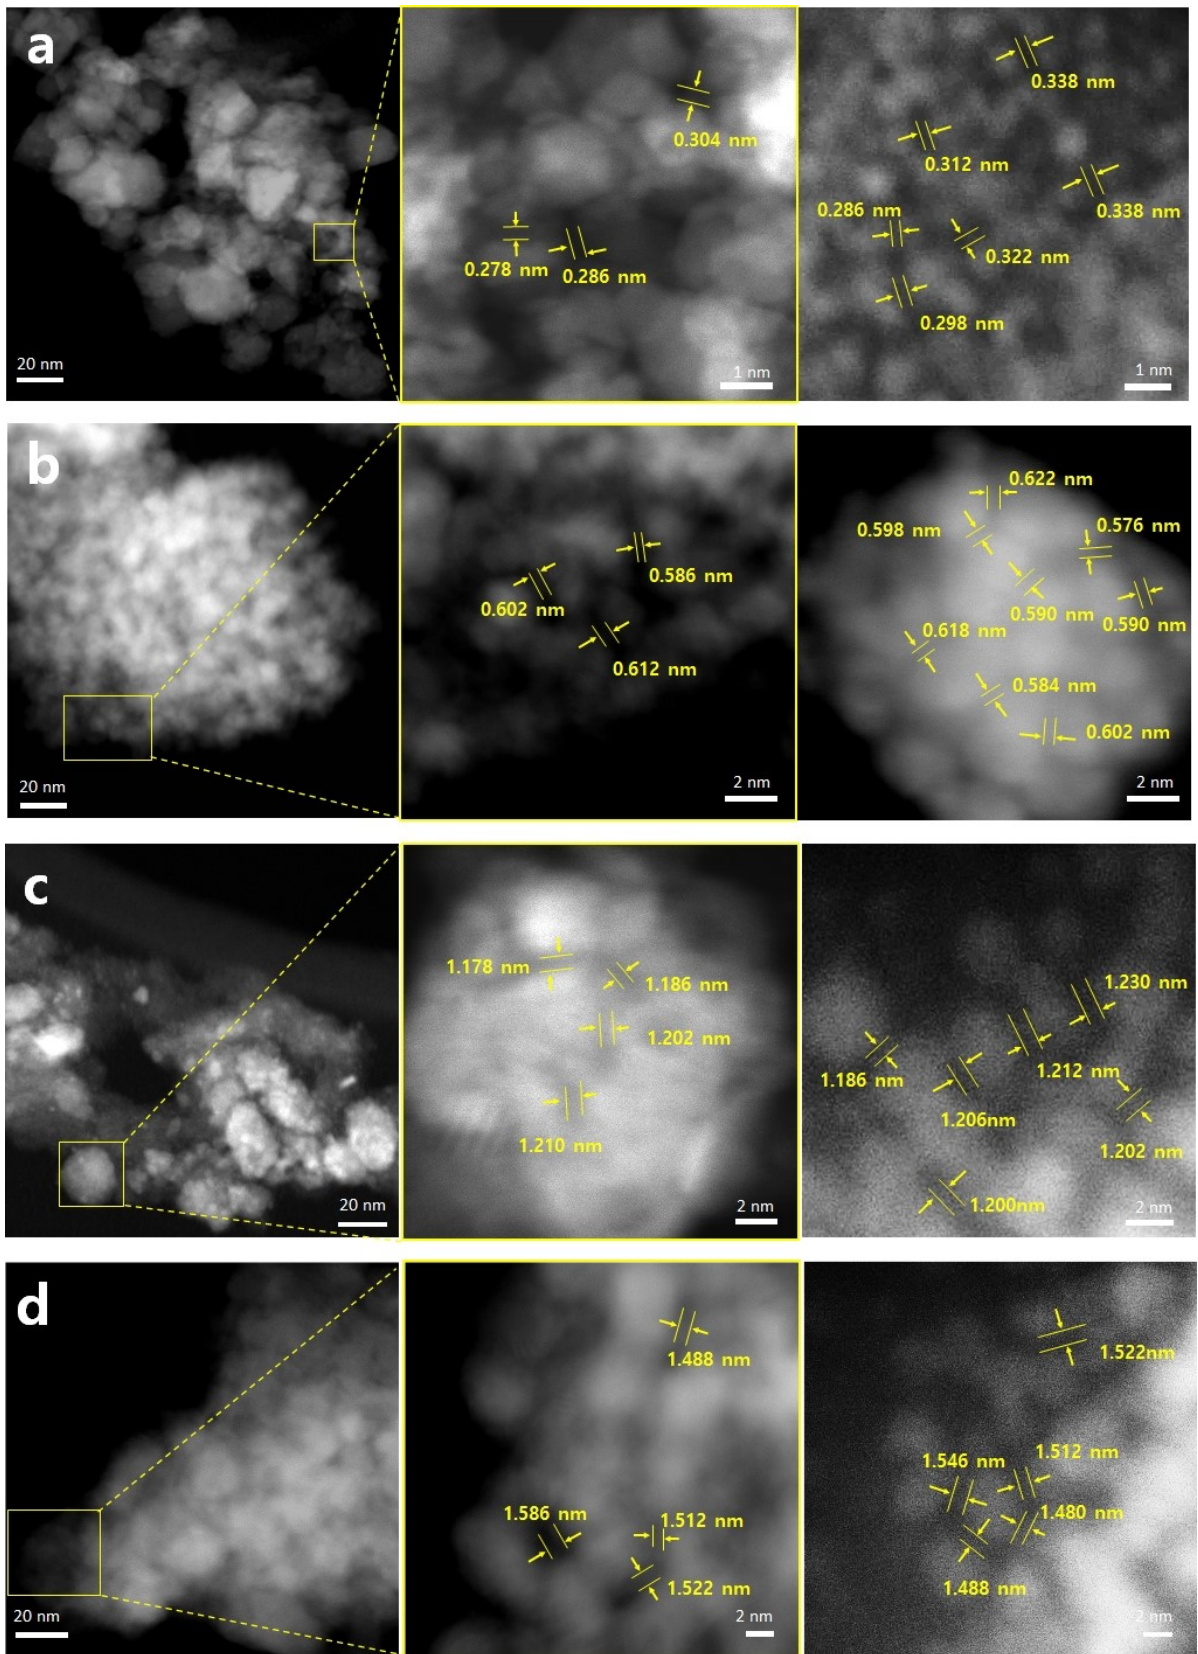

**Fig. S8.** Distances of 'atomic-scale spacings ( $d_s$ )' estimated from STEM images. A line and area profile method (Fig. S6) was used to measure  $d_s$  described. (a) Step I, (b) Step II, (c) Step III, and (d) step IV.

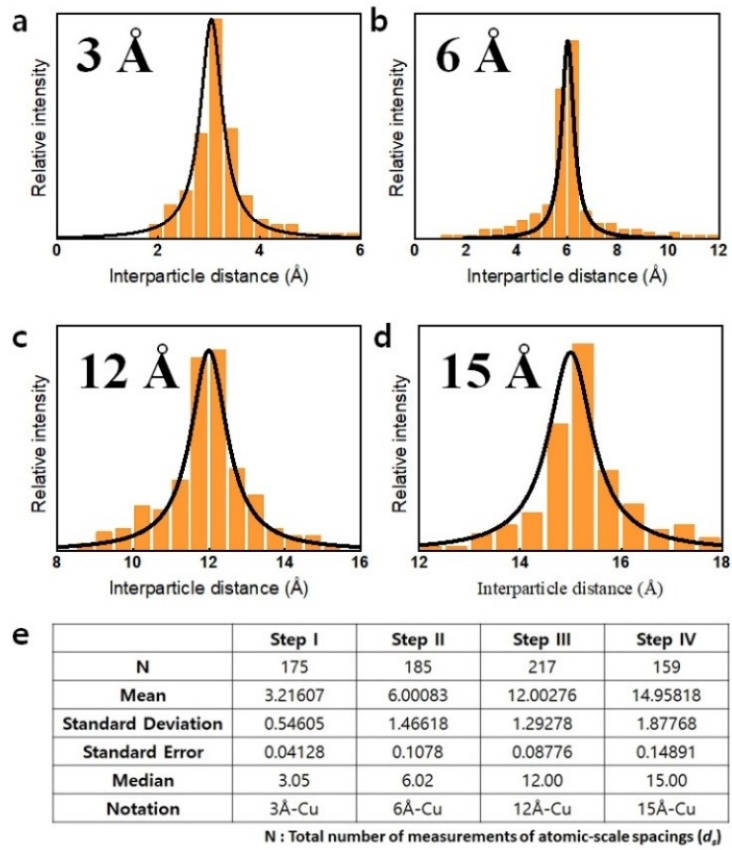

**Fig. S9. Statistical distribution of 'atomic-scale spacings ( $d_s$ )' measured from STEM images.** Statistical distributions were plotted based on the measurement of  $d_s$  from STEM images (Fig. S7). (a) Step I, (b) Step II, (c) Step III, and (d) step IV. (e) Also, the results of statistics from a-d were summarized. We conducted a statistical analysis based on the measurement of over 150  $d_s$  for all the samples.

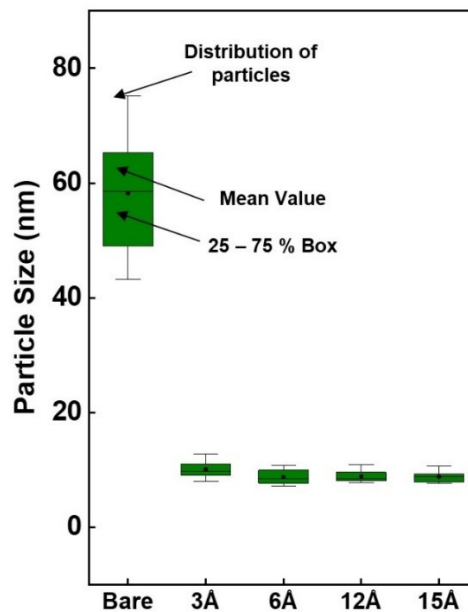

**Fig. S10. Particle size distribution** from the measurement of TEM images. The average and mean values of particles from bare, 3Å-Cu, 6Å-Cu, 12Å-Cu, and 15Å-Cu were plotted.

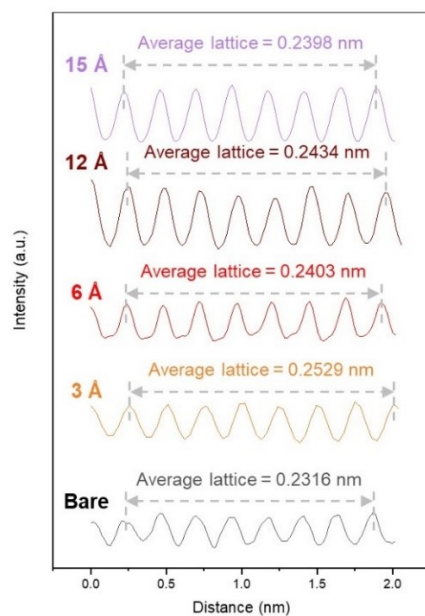

Fig. S11. Intensity profiles along lines vertical to lattice fringes of the TEM images of  $\text{Cu}_2\text{O}$ .

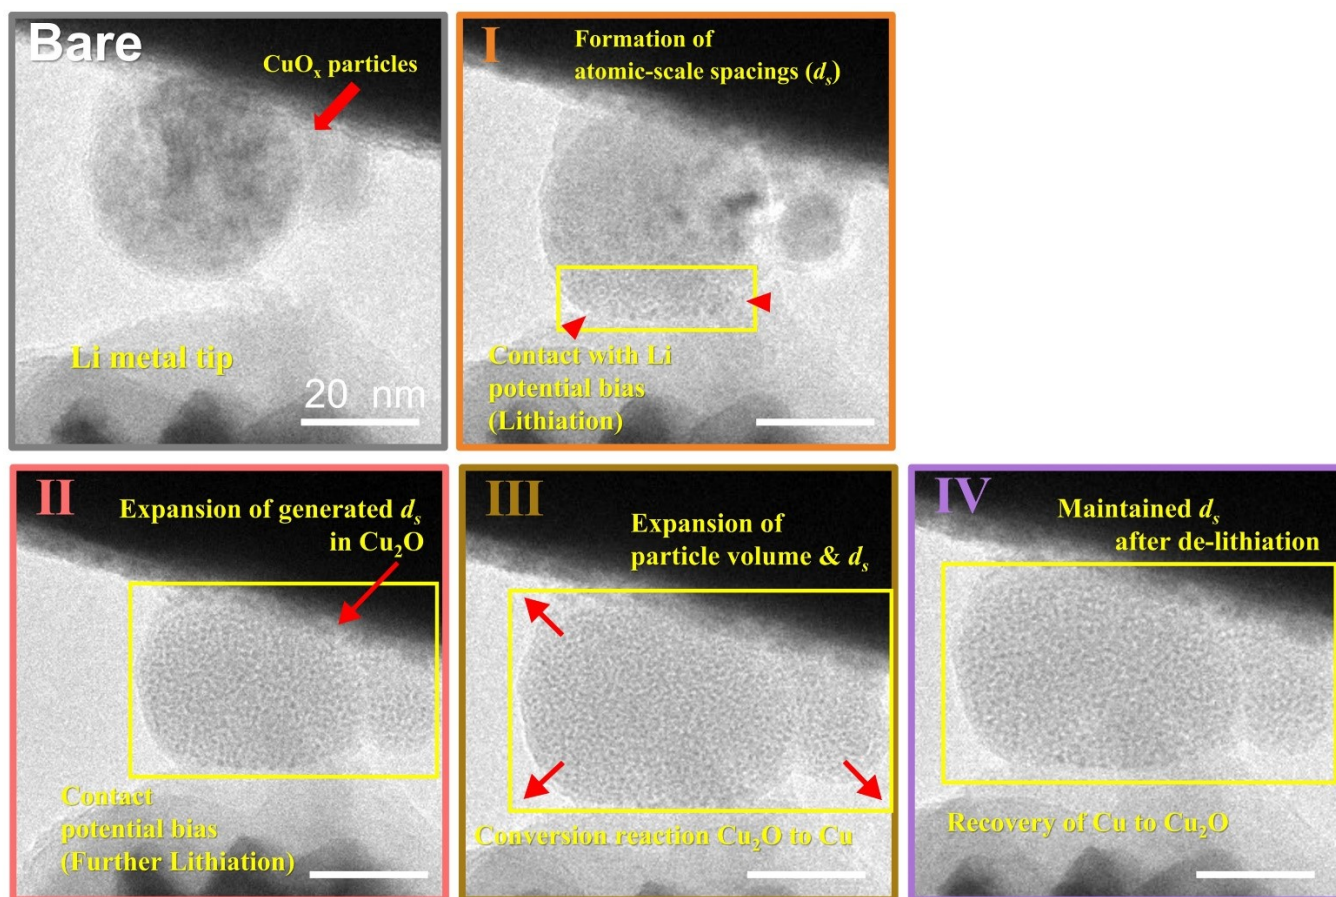

Fig. S12. *in-situ* TEM analysis. Lithiation of  $\text{Cu}_2\text{O}$  was observed with real-time TEM techniques where only two  $\text{Cu}_2\text{O}$  particles are in contact with each other. The detailed process of contact with the Li metal tip is also described.



**a Aqueous phase cell**      **b GDE(Gas diffusion electrode) cell**

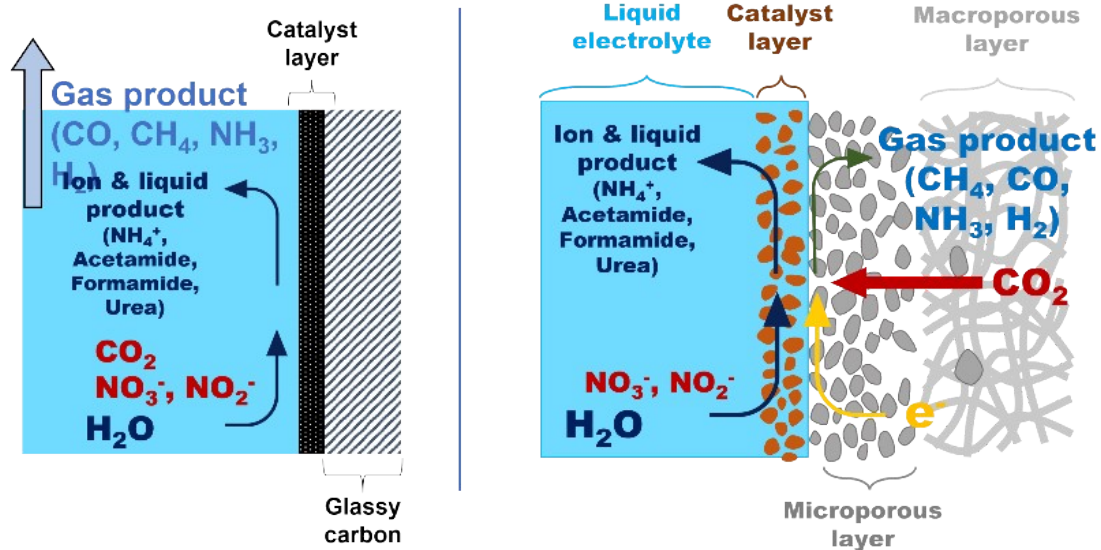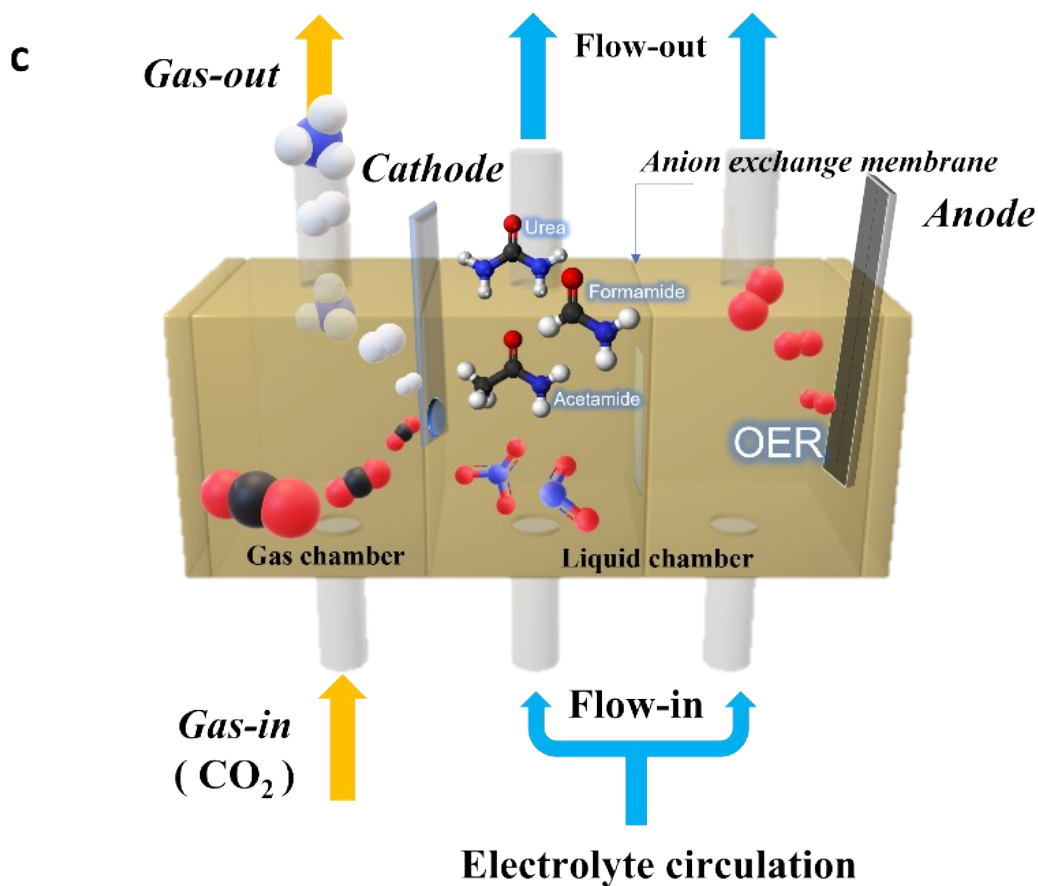

Fig. S13. Comparison of CR- $\text{CO}_2/\text{NO}_3^-$  in aqueous phase H cell and gas phase GDE cell. (a) Aqueous phase H cell. (b) Gas phase GDE cell. (c) Reaction schemes for GDE cell.

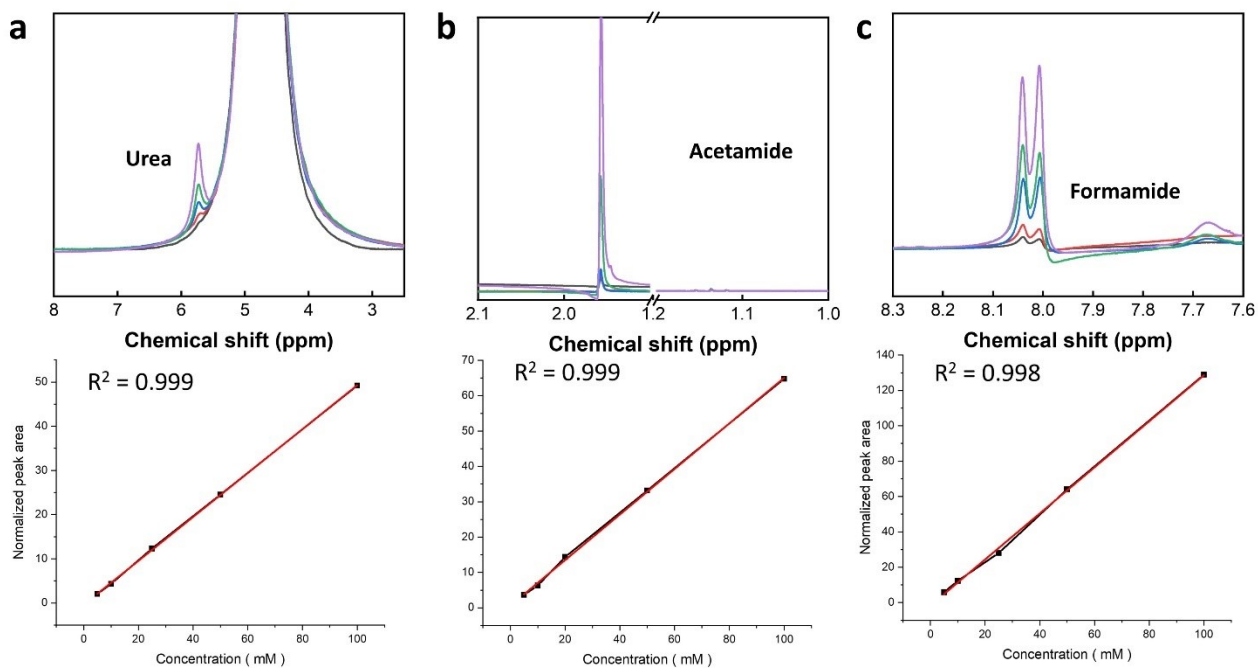

**Fig. S14. Calibration data of C-N coupled products (urea, acetamide, and formamide).** From the measurement of FT-NMR, each product was calibrated. 5, 10, 25, 50, and 100 mM of analytes were added to an aqueous solution. The peak area of the characteristic peak was used for calibration. (a) urea, (b) acetamide, and (c) formamide.

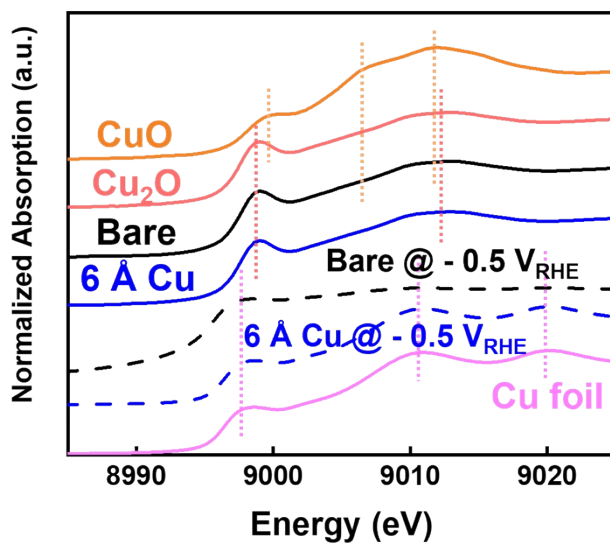

**Fig. S15. *In-situ* XANES analysis of bare and 6 Å-Cu under the operating condition of CR-CO<sub>2</sub>/NO<sub>3</sub><sup>-</sup>.** Structural change from Cu<sub>2</sub>O to metallic Cu was confirmed.

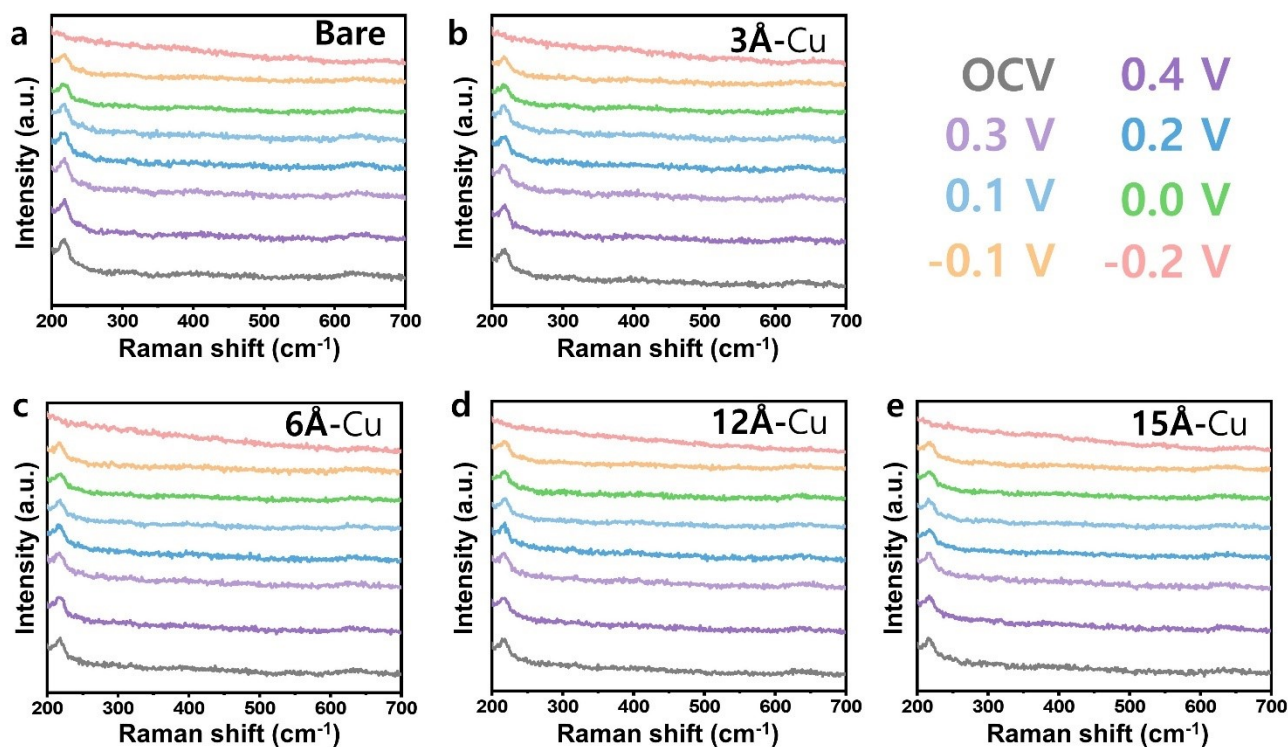

**Fig. S16.** *In-situ* Raman spectroscopy measurements of  $\text{Cu}_2\text{O}$  sisters. From the open-circuit-voltage (OCV) and  $0.4 V_{\text{RHE}}$ , negative reduction potential was applied while Raman spectroscopy was measured. (a) Bare, (b)  $3\text{\AA}$ -Cu, (c)  $6\text{\AA}$ -Cu, (d)  $12\text{\AA}$ -Cu, and (e)  $15\text{\AA}$ -Cu. All the samples showed conversion of  $\text{Cu}_2\text{O}$  into metallic Cu under cathodic polarization.

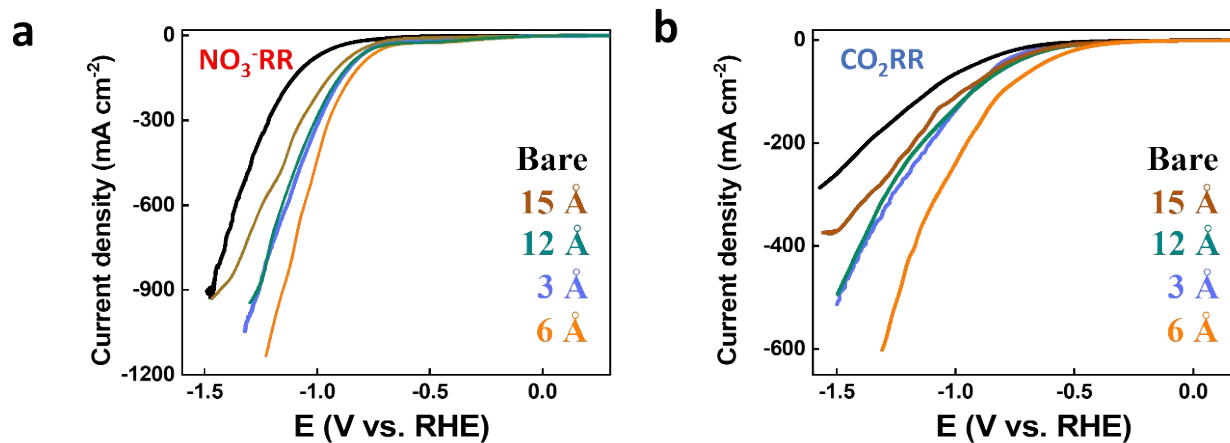

**Fig. S17.** Electrochemical  $\text{NO}_3^-$ RR and  $\text{CO}_2$ RR. Linear sweep voltammetry was conducted to investigate the electrochemical performance of each reaction. LSVs were performed with a scan rate of  $10 \text{ mV s}^{-1}$ . (a)  $\text{NO}_3^-$ RR and (b)  $\text{CO}_2$ RR.



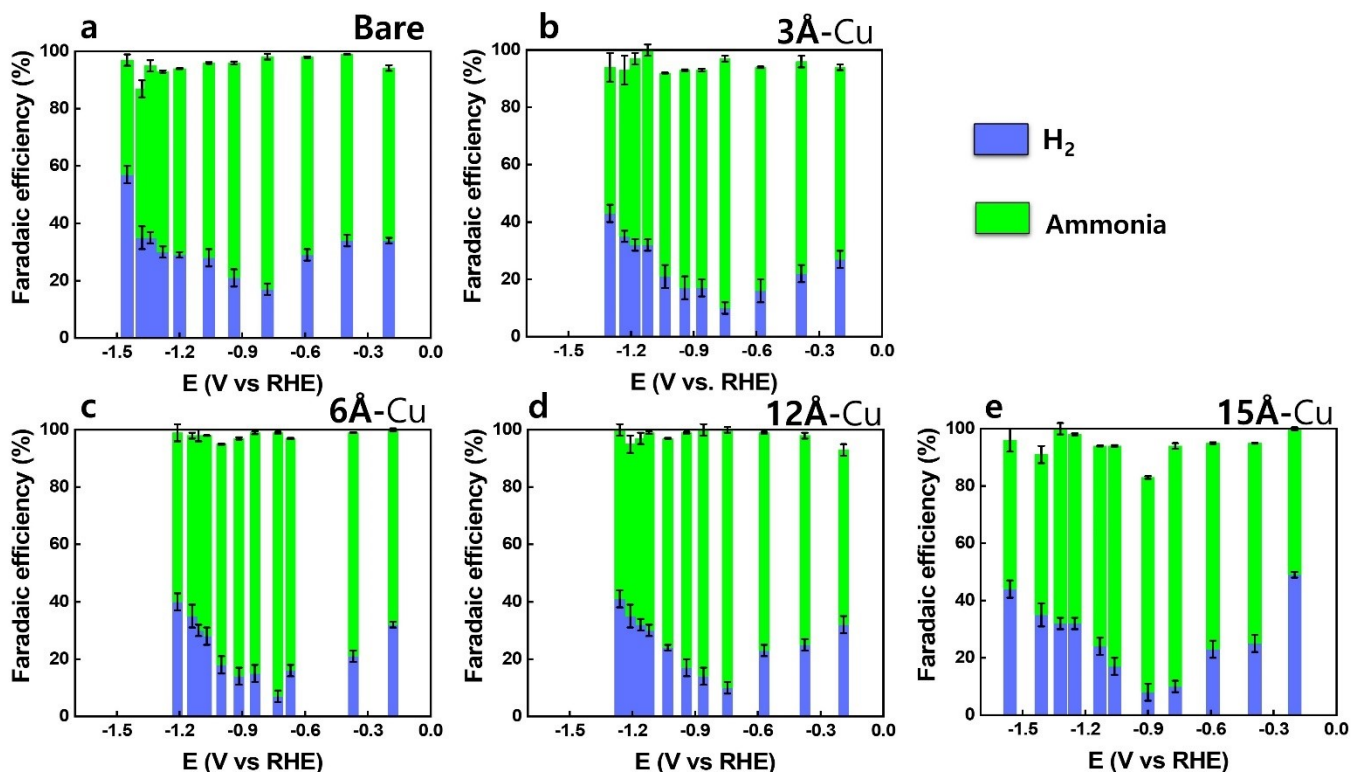

Fig. S18. Product analysis of  $\text{NO}_3^-$ RR. Depending on  $d_s$ , synthesized ammonia and hydrogen Faradaic efficiencies are described depending on applied potentials. (a) Bare, (b)  $3\text{\AA}$ -Cu, (c)  $6\text{\AA}$ -Cu, (d)  $12\text{\AA}$ -Cu, and (e)  $15\text{\AA}$ -Cu.

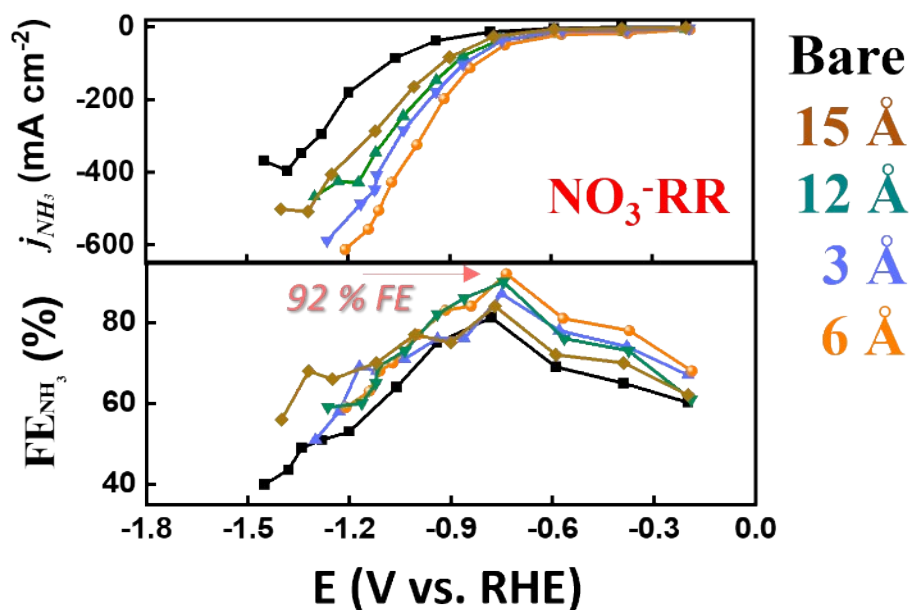

Fig. S19. Electrochemical  $\text{NO}_3^-$  reduction reaction ( $\text{NO}_3^-$ RR). Chronopotentiometry (CP) induced ammonia partial current density ( $j_{\text{NH}_3}$ ) and ammonia Faradaic efficiency ( $\text{FE}_{\text{NH}_3}$ ) according to applied potentials. As we used an alkaline electrolyte, therefore, the released ammonia was trapped in a 1 M hydrochloric acid solution.

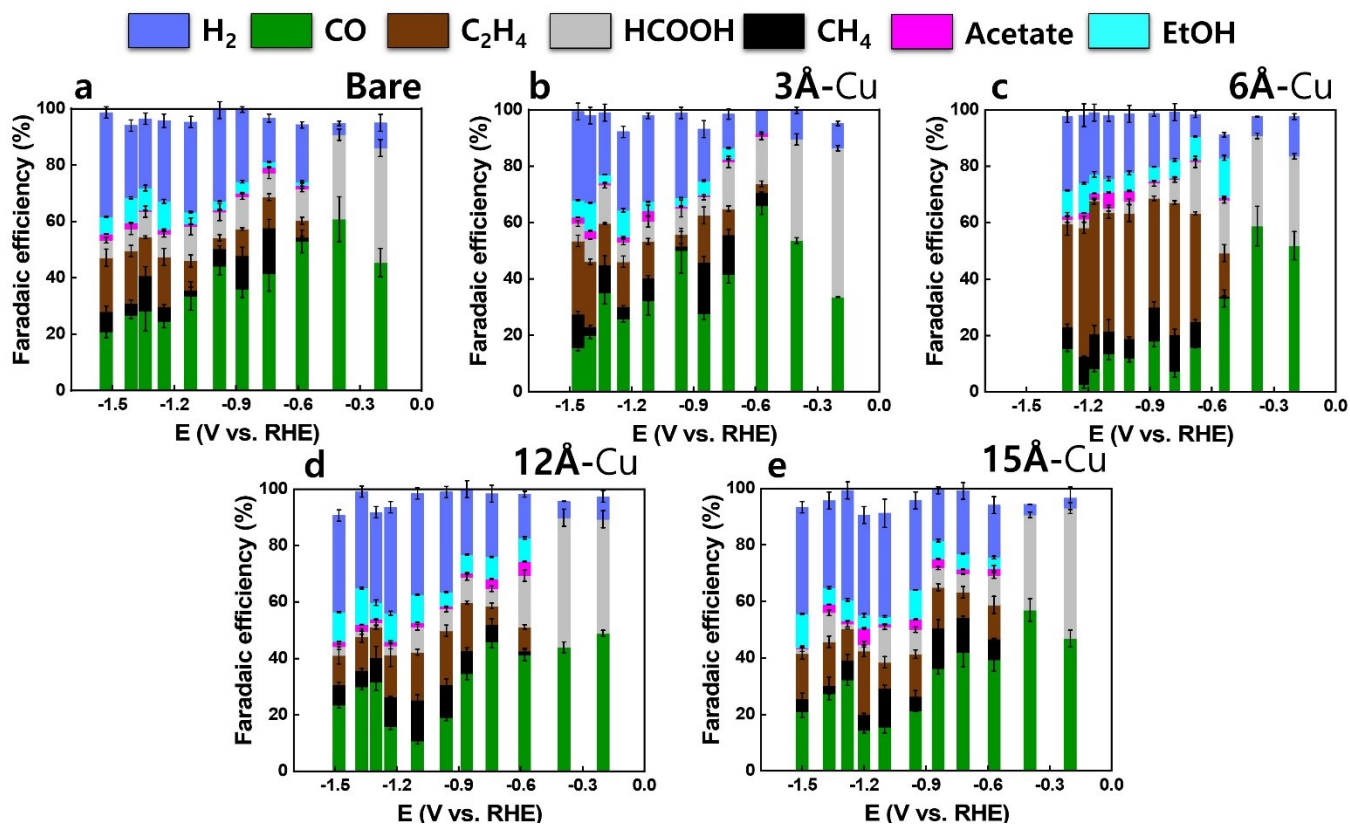

Fig. S20. Product analysis of CO<sub>2</sub>RR. Depending on  $d_s$ , synthesized CO<sub>2</sub>RR products' Faradaic efficiencies are described depending on applied potentials. (a) Bare, (b) 3Å-Cu, (c) 6Å-Cu, (d) 12Å-Cu, and (e) 15Å-Cu.

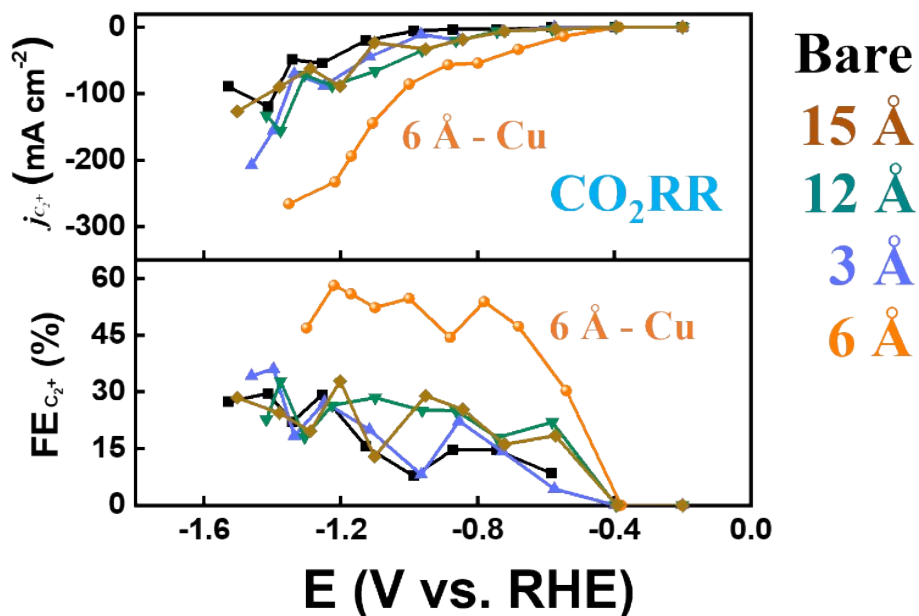

Fig. S21. Electrochemical CO<sub>2</sub> reduction reaction (CO<sub>2</sub>RR). Chronopotentiometry (CP) induced C<sub>2+</sub> partial current density ( $j_{C_2^+}$ ) and C<sub>2+</sub> Faradaic efficiency ( $FE_{C_2^+}$ ) according to applied potentials.

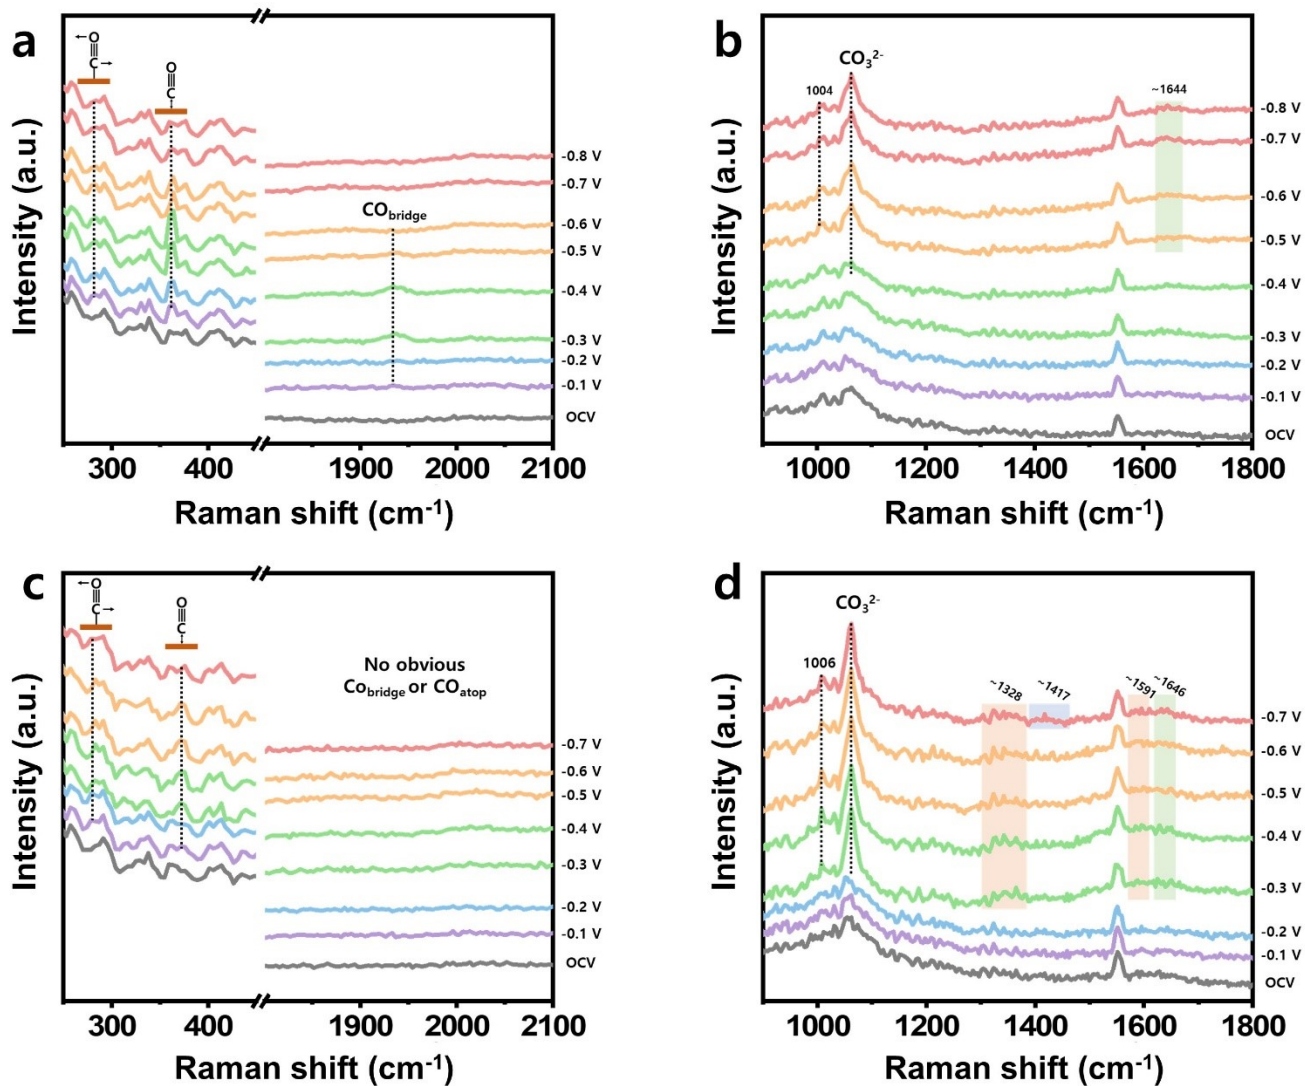

Fig. S22. *In-situ* Raman spectra of different catalysts under different applied potentials during CR-CO<sub>2</sub>/NO<sub>3</sub><sup>-</sup>. Raman spectra of bare Cu<sub>2</sub>O at (a) CO region and (b) C-N coupling region. Raman spectra of 6Å-Cu at (c) CO region and (d) C-N coupling region.

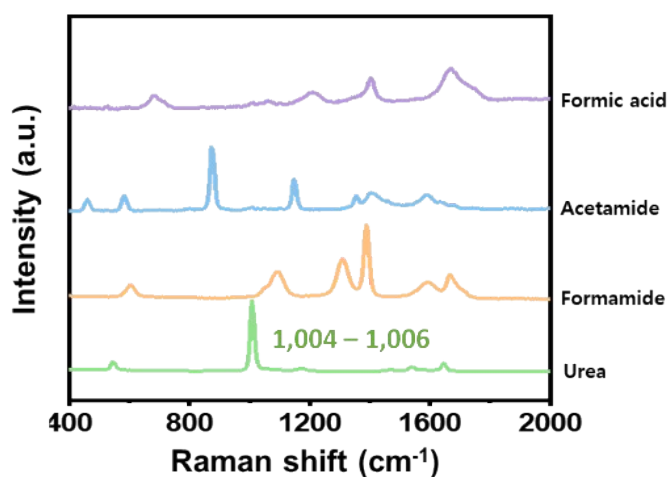

Fig. S23. Reference Raman spectra of possible liquid products.

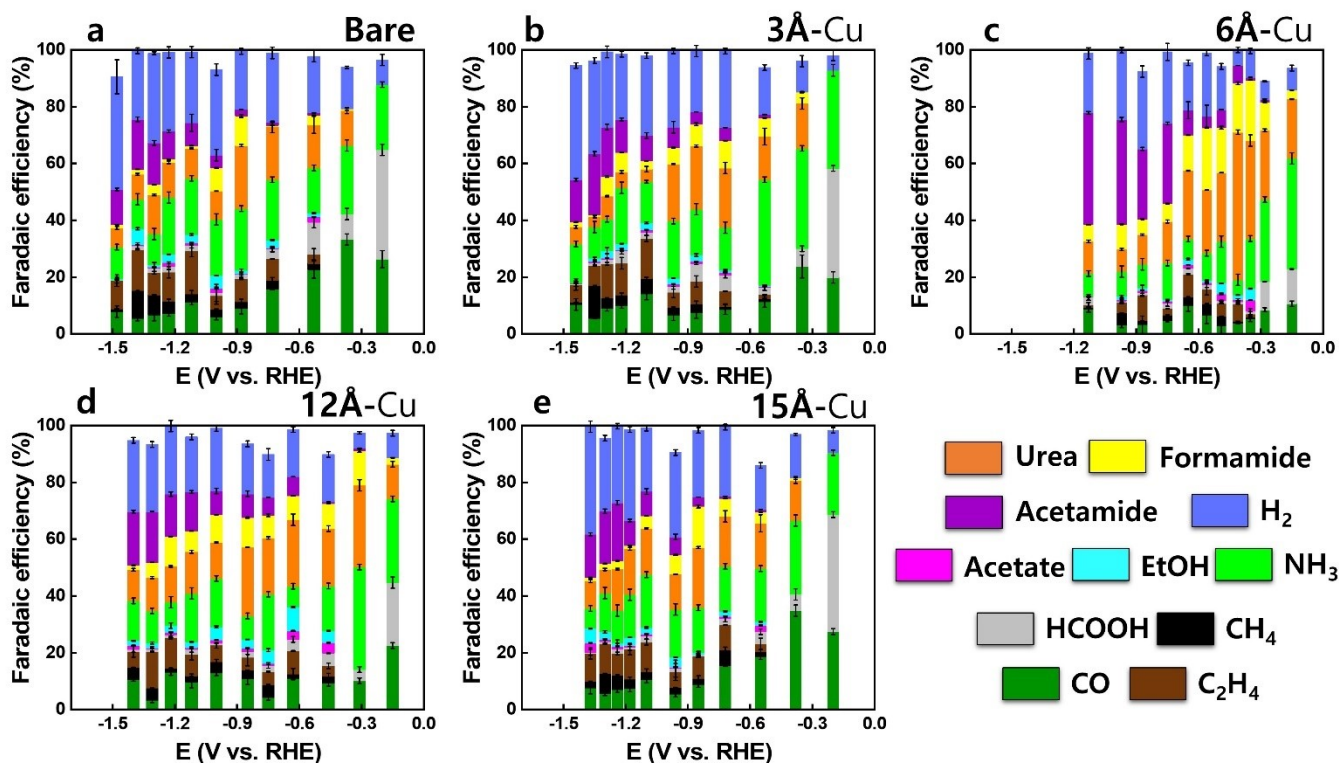

Fig. S24. Product analysis of CR-CO<sub>2</sub>/NO<sub>3</sub><sup>-</sup>. Depending on  $d_s$ , synthesized CR-CO<sub>2</sub>/NO<sub>3</sub><sup>-</sup> products' Faradaic efficiencies are described depending on applied potentials. (a) Bare, (b) 3Å-Cu, (c) 6Å-Cu, (d) 12Å-Cu, and (e) 15Å-Cu.

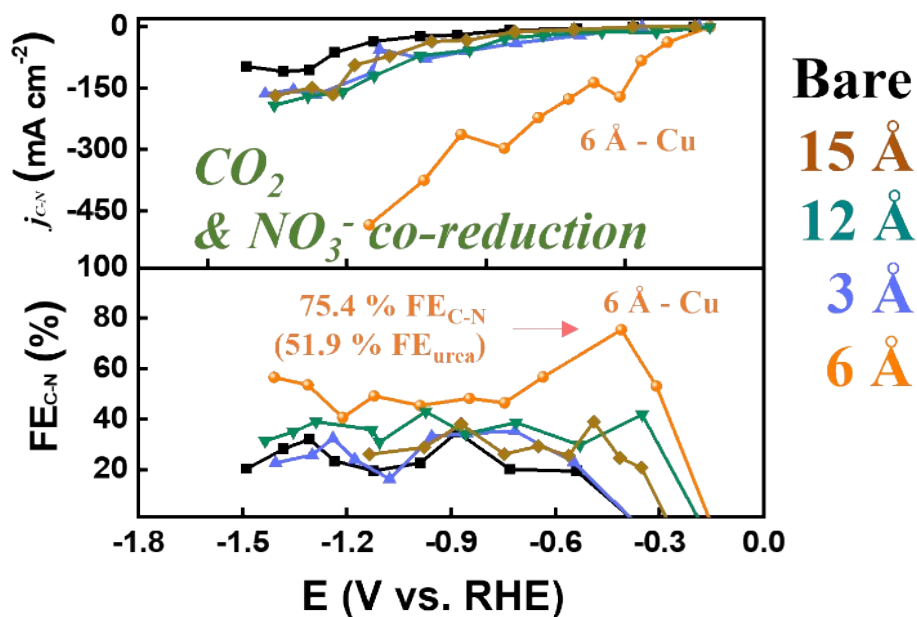

Fig. S25. Electrochemical CO<sub>2</sub> and NO<sub>3</sub><sup>-</sup> co-reduction reaction (CR-CO<sub>2</sub>/NO<sub>3</sub><sup>-</sup>). Chronopotentiometry (CP) induced C-N products partial current density ( $j_{C-N}$ ) and C-N Faradaic efficiency (FE<sub>C-N</sub>) according to applied potentials.



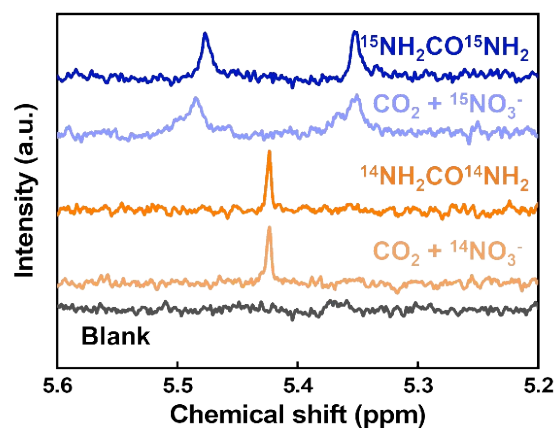

**Fig. S26. Isotope experiment.**  $^1\text{H}$  NMR spectra of electrolyte after the chronopotentiometry experiment of  $\text{CO}_2 + ^{14}\text{NO}_3^- / \text{CO}_2 + ^{15}\text{NO}_3^-$  and standard  $^{14}\text{N}$ -urea /  $^{15}\text{N}$ -urea solution. Comparison of standard solution and experimental products gives evidence of urea synthesis from  $\text{CO}_2$  and  $\text{NO}_3^-$  without the effect of impurities.

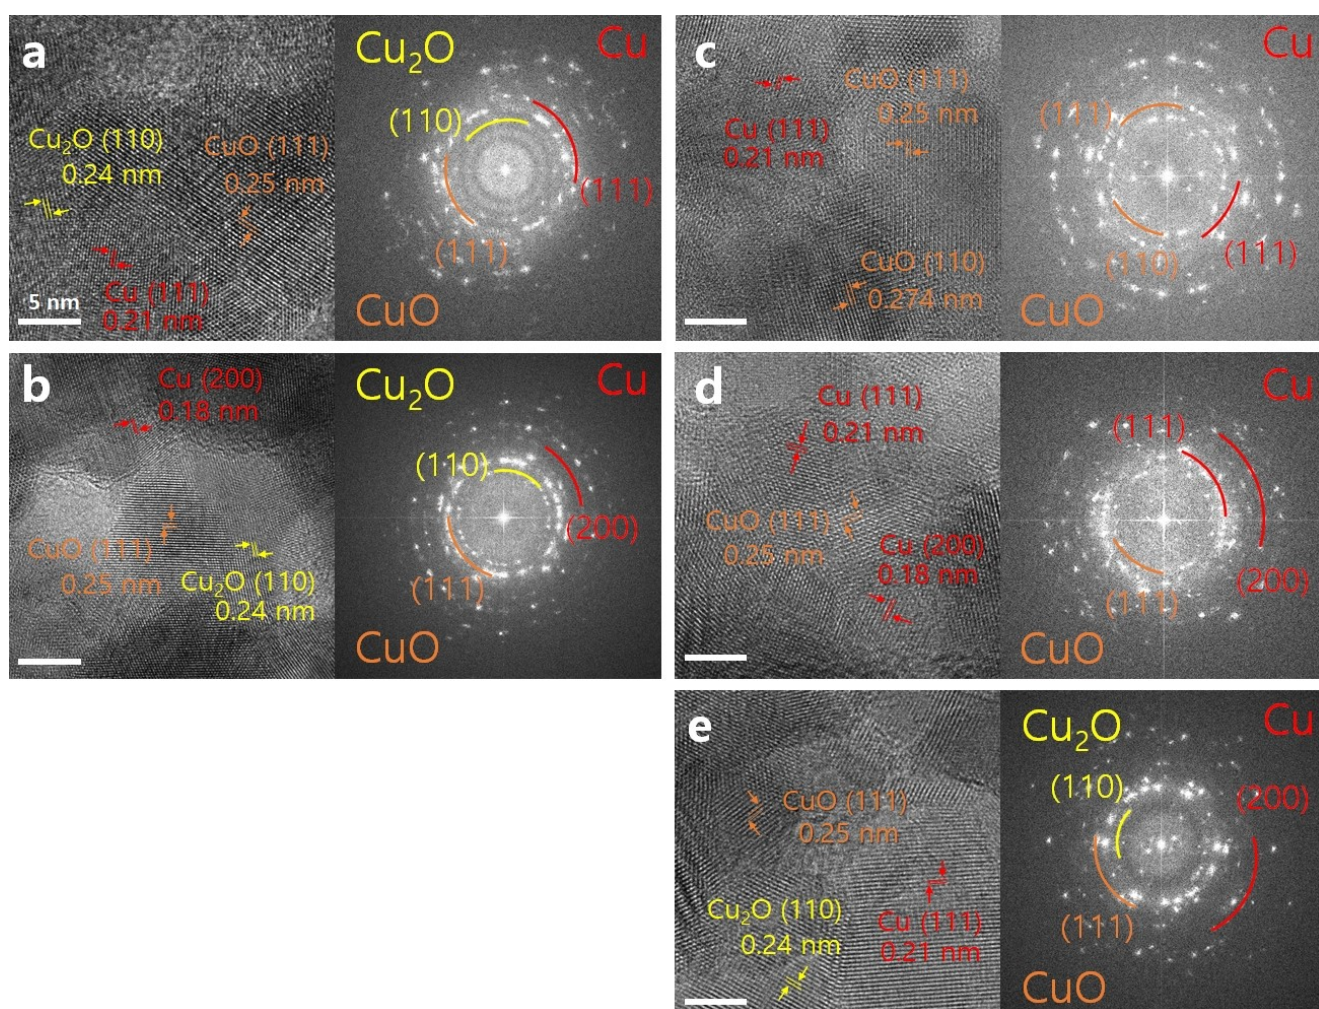

**Fig. S27. HR-TEM images with FFT analysis after electrocatalysis.** Lattices and facets were analysed on TEM images with an inset of FFT. (a) Bare, (b) 3Å-Cu, (c) 6Å-Cu, (d) 12Å-Cu, and (e) 15Å-Cu. We note that all the samples including bare  $\text{Cu}_2\text{O}$  are measured after 1 h of CR- $\text{CO}_2/\text{NO}_3^-$ .

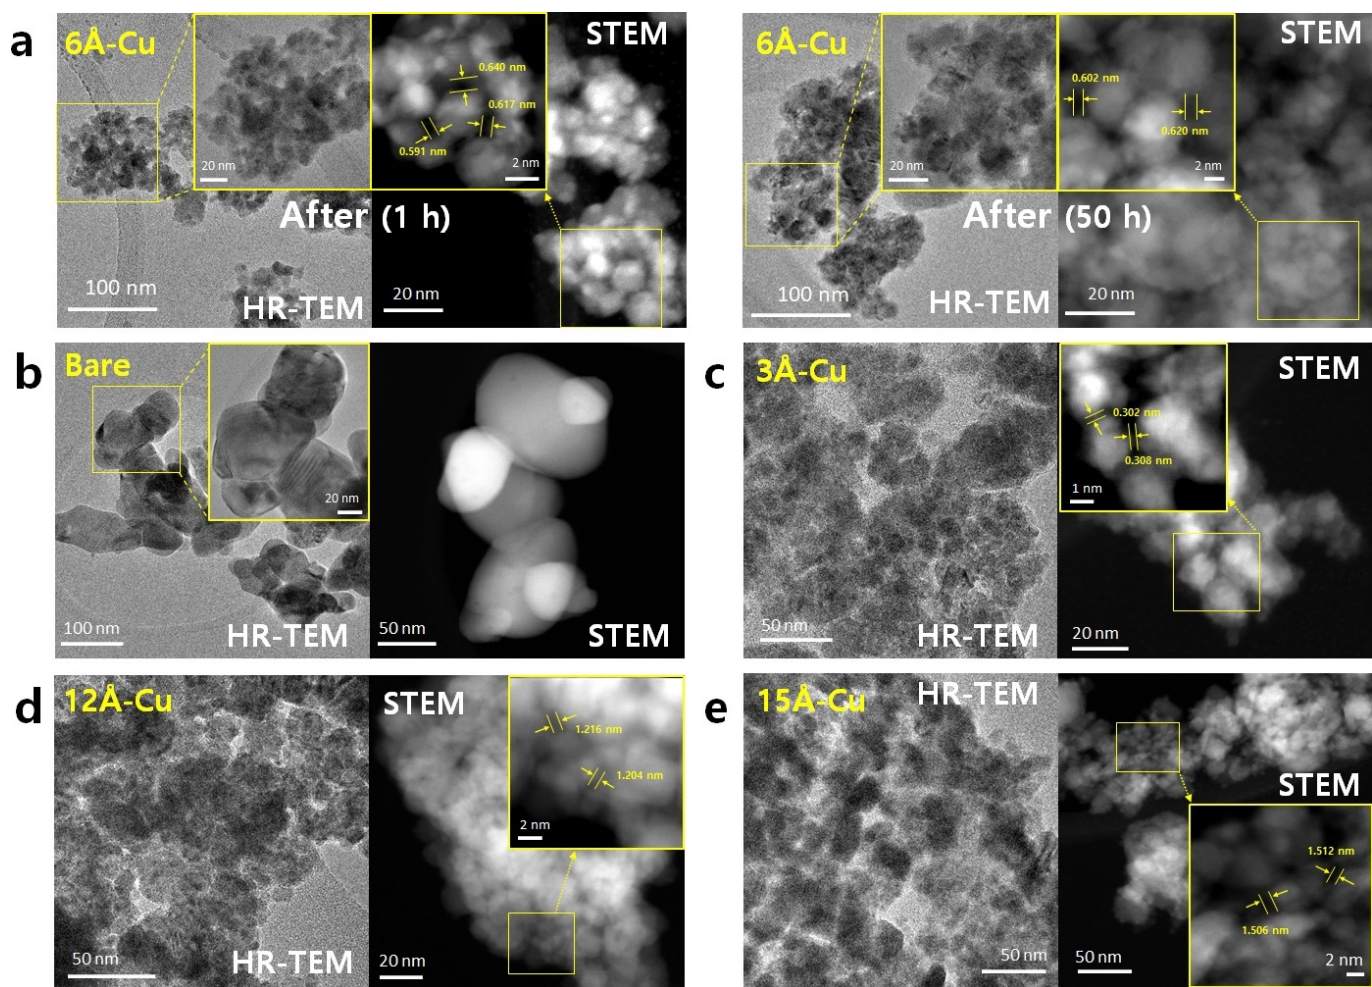

**Fig. S28. Morphology and atomic-scale spacings ( $d_s$ ) from HR-TEM and STEM images after electrocatalysis.** (a) 6Å-Cu after 1 h CR-CO<sub>2</sub>/NO<sub>3</sub><sup>-</sup> (left side of images) and after 50 h CR-CO<sub>2</sub>/NO<sub>3</sub><sup>-</sup> (right side of images), (b) bare after 1 h CR-CO<sub>2</sub>/NO<sub>3</sub><sup>-</sup>, (c) 3Å-Cu after 1 h CR-CO<sub>2</sub>/NO<sub>3</sub><sup>-</sup>, (d) 12Å-Cu after 1 h CR-CO<sub>2</sub>/NO<sub>3</sub><sup>-</sup>; and (e) 15Å-Cu after 1 h CR-CO<sub>2</sub>/NO<sub>3</sub><sup>-</sup>. The HR-TEM and STEM images show that the morphology and the atomic-scale spacings of the lithiated/de-lithiated Cu catalysts were maintained after the electrochemical CR-CO<sub>2</sub>/NO<sub>3</sub><sup>-</sup>.



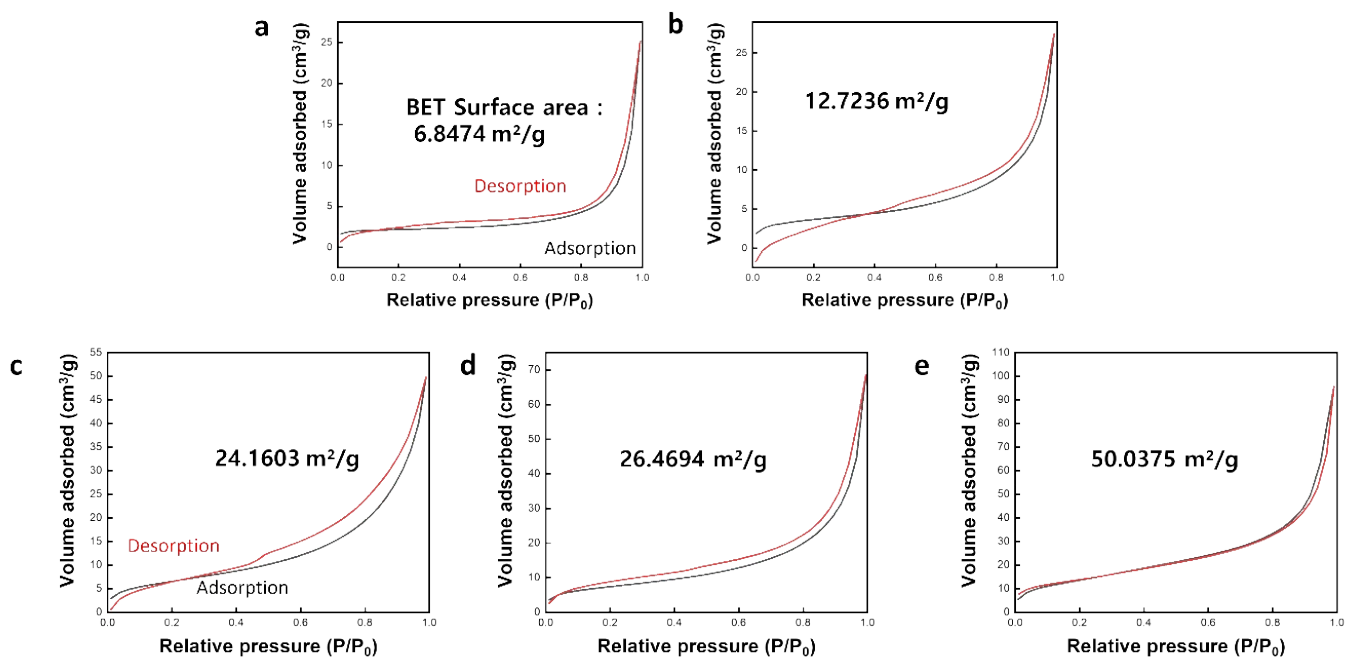

Fig. S29. BET surface area comparison. Specific BET surface area values were obtained. Adsorption and desorption profiles of each sample. (a) Bare, (b) 3Å-Cu, (c) 6Å-Cu, (d) 12Å-Cu, and (e) 15Å-Cu.

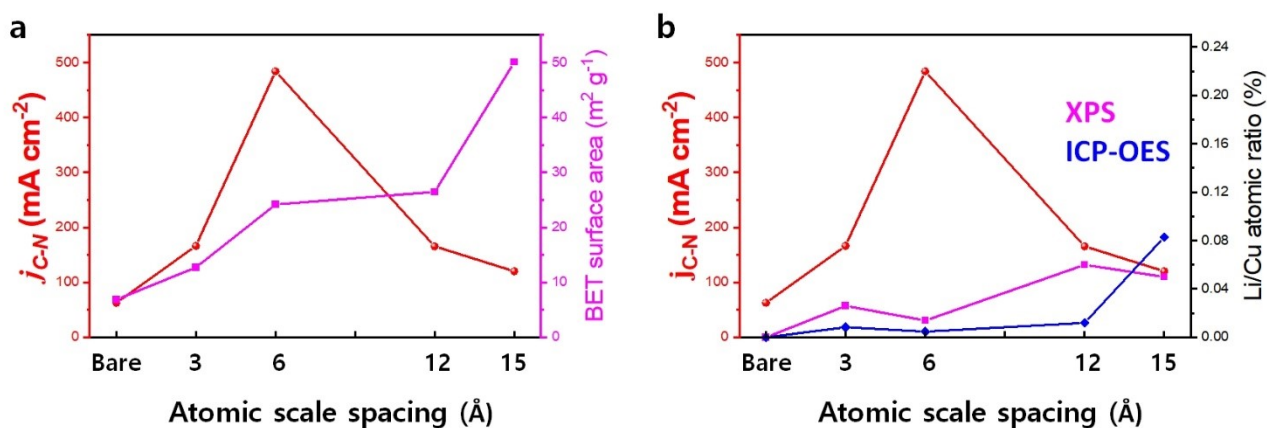

Fig. S30. Comparison of catalytic activity with specific surface area (a), Li/Cu ratio (b) as a function of  $d_s$ . The partial current density of C-N coupling is not consistent with the effects of specific BET surface area and residual lithium contents.

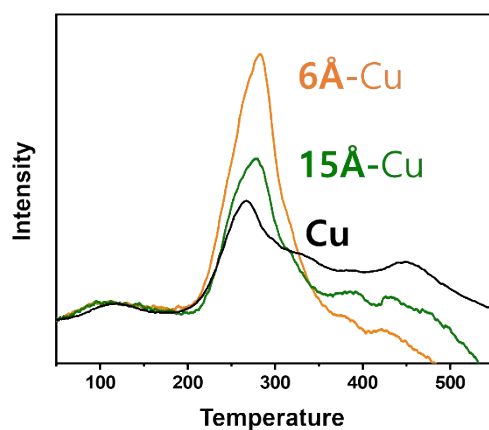

**Fig. S31.** CO<sub>2</sub> temperature programmed desorption (CO<sub>2</sub>-TPD) results. CO<sub>2</sub>-TPD of 6Å-, 15Å-Cu and Cu reference was measured.

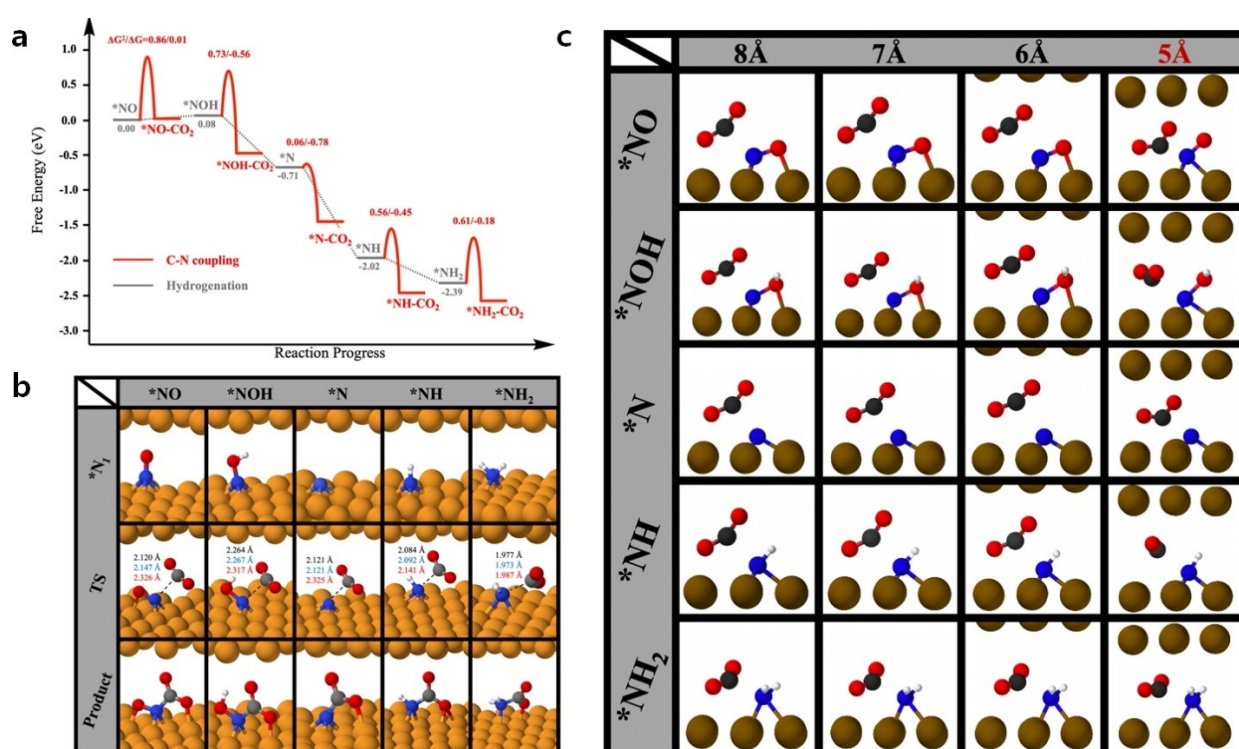

**Fig. S32.** (a) The energetics of  $*N_1$  hydrogenation by proton-electron pairs and its coupling reactions with CO<sub>2</sub> at  $U = 0.0$  V<sub>SHE</sub> and pH = 0; (b) reduction of  $*NO$  to  $*NOH$ ,  $*N$ ,  $*NH$ , and  $*NH_2$ , and the formation of C-N coupling transition states and products through  $*N_1$  intermediates reacting with CO<sub>2</sub>. During the transition states, a C-N bond is being formed, and the bond lengths at  $d_s$  of 8, 7, and 6 Å are denoted and visually distinguished by black, blue, and red colors. (c) The transition state structures of C-N formation through the coupling of  $*N_1$  intermediates with CO<sub>2</sub> at different  $d_s$ .

**Table S1. Atomic composition of samples and Li/Cu ratio from XPS measurements**

| XPS                  | Composition (atomic %) |       | Li/Cu atomic ratio |
|----------------------|------------------------|-------|--------------------|
|                      |                        |       |                    |
| Bare                 | Cu                     | 62.72 | 0                  |
|                      | Li                     | -     |                    |
|                      | O                      | 35.13 |                    |
| Step I<br>(3Å-Cu)    | Cu                     | 48.11 | 0.026              |
|                      | Li                     | 1.26  |                    |
|                      | O                      | 43.08 |                    |
| Step II<br>(6Å-Cu)   | Cu                     | 49.11 | 0.014              |
|                      | Li                     | 0.68  |                    |
|                      | O                      | 43.58 |                    |
| Step III<br>(12Å-Cu) | Cu                     | 42.59 | 0.060              |
|                      | Li                     | 2.56  |                    |
|                      | O                      | 45.94 |                    |
| Step IV<br>(15Å-Cu)  | Cu                     | 47.89 | 0.050              |
|                      | Li                     | 2.40  |                    |
|                      | O                      | 49.06 |                    |

**Table S2. Atomic composition of samples and Li/Cu ratio from ICP-OES measurements**

| ICP-OES              | Composition (ppm) |         | Li/Cu atomic ratio |
|----------------------|-------------------|---------|--------------------|
|                      |                   |         |                    |
| Bare                 | Cu                | 893,429 | 0                  |
|                      | Li                | -       |                    |
| Step I<br>(3Å-Cu)    | Cu                | 807,884 | 0.0084             |
|                      | Li                | 7.40    |                    |
| Step II<br>(6Å-Cu)   | Cu                | 783,831 | 0.0048             |
|                      | Li                | 4.07    |                    |
| Step III<br>(12Å-Cu) | Cu                | 817,324 | 0.012              |
|                      | Li                | 10.3    |                    |
| Step IV<br>(15Å-Cu)  | Cu                | 800,042 | 0.083              |
|                      | Li                | 7.28    |                    |

**Table S3. Comparison of electrochemical C-N coupling electrocatalysts**

| Catalyst                                           | Media                                                   | FE (%)      | Partial current density<br>(mA cm <sup>-2</sup> ) | Urea yield rate                                                    | Stability (h) | Ref.             |
|----------------------------------------------------|---------------------------------------------------------|-------------|---------------------------------------------------|--------------------------------------------------------------------|---------------|------------------|
| <b>CO<sub>2</sub> + NO<sub>3</sub><sup>-</sup></b> |                                                         |             |                                                   |                                                                    |               |                  |
| Cu with atomic-scale spacings                      | <b>1 M KOH</b>                                          | <b>51.9</b> | <b>115.25</b>                                     | <b>7,541.9 μg h<sup>-1</sup><br/>mg<sub>cat</sub><sup>-1</sup></b> | <b>50</b>     | <b>This work</b> |
| Zn                                                 | 0.2 M KHCO <sub>3</sub>                                 | 35          | -                                                 | 15.13 mmol h <sup>-1</sup> g <sup>-1</sup>                         | -             | (1)              |
| Ni-Pc                                              | 0.2 M KHCO <sub>3</sub>                                 | 41          | 11                                                | -                                                                  | -             | (2)              |
| TiO <sub>2</sub> /Nafion                           | 0.1 M KNO <sub>3</sub>                                  | 40          | 0.8                                               | 0.33 μmol h <sup>-1</sup>                                          | 2             | (3)              |
| In(OH) <sub>3</sub>                                | 0.1 M KHCO <sub>3</sub>                                 | 53.4        | 0.3                                               | 533.1 μg h <sup>-1</sup><br>mg <sub>cat</sub> <sup>-1</sup>        | 12            | (4)              |
| XC72R-AuPd                                         | 0.025 M KNO <sub>3</sub> +<br>0.075 M KHCO <sub>3</sub> | 15.6        | 3 (estimated)                                     | 204.2 μg h <sup>-1</sup><br>mg <sub>cat</sub> <sup>-1</sup>        | 10 cycles     | (5)              |
| Cu-N-C catalysts                                   | 0.1 M KHCO <sub>3</sub>                                 | 28          | 27                                                | 1800 μg h <sup>-1</sup><br>mg <sub>cat</sub> <sup>-1</sup>         | 12            | (6)              |
| FeNi-DASC                                          | 0.1 M KHCO <sub>3</sub>                                 | 17.8        | 8 (estimated)                                     | 20.2 mmol h <sup>-1</sup> g <sub>cat</sub> <sup>-1</sup>           | 5             | (7)              |
| PdCu/CBC                                           | 0.05 M KNO <sub>3</sub>                                 | 69.1        | 2.8 (estimated)                                   | 763.8 μg h <sup>-1</sup><br>mg <sub>cat</sub> <sup>-1</sup>        | 10            | (8)              |
| <b>CO<sub>2</sub> + NO<sub>2</sub><sup>-</sup></b> |                                                         |             |                                                   |                                                                    |               |                  |
| Cu-TiO <sub>2</sub>                                | 0.2 M KHCO <sub>3</sub>                                 | 43.1        | -<br><br>3.448<br>(estimated)                     | 20 μmol h <sup>-1</sup>                                            | 2             | (9)              |
| Te-Pd NCs                                          | 0.05 M KNO <sub>2</sub>                                 | 12.2        | 0.276<br>(estimated)                              | -                                                                  | 5             | (10)             |
| ZnO-V                                              | 0.2 M NaHCO <sub>3</sub> +<br>0.1 M NaNO <sub>2</sub>   | 23.26       | 6.978<br>(estimated)                              | 16.56 μmol h <sup>-1</sup>                                         | 5 cycle       | (11)             |
| <b>CO<sub>2</sub> + N<sub>2</sub></b>              |                                                         |             |                                                   |                                                                    |               |                  |
| PPy-coated Pt                                      | 0.1 M Li <sub>2</sub> SO <sub>4</sub> +                 | 7.1         | -                                                 | 21.2 μmol (5 h)                                                    | 5             | (12)             |

|                                                        |                         |       |                    |                                                |    |      |
|--------------------------------------------------------|-------------------------|-------|--------------------|------------------------------------------------|----|------|
|                                                        | 0.03 M H <sup>+</sup>   |       |                    |                                                |    |      |
| Pd <sub>1</sub> Cu <sub>1</sub> /TiO <sub>2</sub> -400 | 0.1 M KHCO <sub>3</sub> | 8.92  | -                  | 3.36 mmol h <sup>-1</sup> g <sup>-1</sup><br>1 | 12 | (13) |
| Bi/BiVO <sub>4</sub>                                   | 0.1 M KHCO <sub>3</sub> | 12.55 | 0.5 (estimated)    | 5.91 mmol h <sup>-1</sup> g <sup>-1</sup><br>1 | 10 | (14) |
| BiFeO <sub>3</sub> /BiVO <sub>4</sub>                  | 0.1 M KHCO <sub>3</sub> | 17.18 | 3.1<br>(estimated) | 4.94 mmol h <sup>-1</sup> g <sup>-1</sup>      | 10 | (15) |
| Ni(BO <sub>3</sub> ) <sub>2</sub>                      | 0.1 M KHCO <sub>3</sub> | 20.36 | 2.44               | 9.70 mmol h <sup>-1</sup> g <sup>-1</sup>      | 2  | (16) |
| InOOH                                                  | 0.1 M KHCO <sub>3</sub> | 20.97 | -                  | 6.85 mmol h <sup>-1</sup> g <sup>-1</sup>      | -  | (17) |

**Table S4. Free energy barriers and reaction free energies (in parentheses) for 15 C-N coupling reactions (the unit is eV)**

|                                               | *NO          | *NOH         | *N           | *NH          | *NH <sub>2</sub> |
|-----------------------------------------------|--------------|--------------|--------------|--------------|------------------|
| <b><i>Coupling with CO<sub>2(g)</sub></i></b> |              |              |              |              |                  |
| <b><i>d = 5.0 Å</i></b>                       | 0.87 (-0.40) | 0.96 (-0.73) | 0.29 (-1.88) | 0.93 (-0.62) | 0.76 (-0.19)     |
| <b><i>d = 6.0 Å</i></b>                       | 0.86 (0.01)  | 0.73 (-0.56) | 0.06 (-0.78) | 0.56 (-0.45) | 0.61 (-0.18)     |
| <b><i>d = 7.0 Å</i></b>                       | 0.90 (0.48)  | 0.67 (-0.26) | 0.19 (-0.34) | 0.66 (-0.10) | 0.70 (0.05)      |
| <b><i>d = 8.0 Å</i></b>                       | 1.00 (0.62)  | 0.75 (-0.17) | 0.29 (-0.18) | 0.75 (0.00)  | 0.77 (0.14)      |
| <b><i>bare</i></b>                            | 1.07 (0.84)  | 0.79 (-0.06) | 0.60 (0.00)  | 0.81 (0.11)  | 0.78 (0.25)      |
| <b><i>Coupling with *COOH</i></b>             |              |              |              |              |                  |
| <b><i>d = 5.0 Å</i></b>                       | 0.86 (-0.21) | 0.85 (0.45)  | 0.47 (-1.10) | 0.93 (-0.17) | 0.92 (-0.03)     |
| <b><i>d = 6.0 Å</i></b>                       | 1.07 (-0.44) | 1.04 (-0.51) | 0.49 (-1.32) | 0.92 (-0.67) | 0.99 (-0.30)     |
| <b><i>d = 7.0 Å</i></b>                       | 1.13 (-0.56) | 1.05 (-0.86) | 0.56 (-1.44) | 0.99 (-0.91) | 1.02 (-0.49)     |
| <b><i>d = 8.0 Å</i></b>                       | 1.14 (-0.54) | 1.07 (-0.84) | 0.56 (-1.39) | 1.03 (-0.85) | 1.02 (-0.40)     |
| <b><i>bare</i></b>                            | 1.12 (-0.47) | 1.04 (-0.75) | 0.65 (-1.27) | 1.09 (-0.62) | 0.99 (-0.30)     |
| <b><i>Coupling with *CO</i></b>               |              |              |              |              |                  |
| <b><i>d = 5.0 Å</i></b>                       | 0.85 (-0.09) | 0.85 (0.36)  | 0.69 (-1.18) | 0.94 (-0.27) | 1.03 (0.52)      |
| <b><i>d = 6.0 Å</i></b>                       | 0.99 (0.92)  | 0.85 (0.26)  | 0.69 (-1.36) | 0.96 (0.40)  | 0.96 (0.27)      |
| <b><i>d = 7.0 Å</i></b>                       | 1.12 (1.10)  | 0.80 (0.28)  | 0.73 (-1.35) | 1.00 (0.52)  | 0.94 (0.27)      |

|                         |             |             |              |             |             |
|-------------------------|-------------|-------------|--------------|-------------|-------------|
| <b><i>d</i> = 8.0 Å</b> | 1.15 (0.90) | 0.80 (0.33) | 0.74 (-1.30) | 1.00 (0.53) | 0.96 (0.33) |
| <b><i>bare</i></b>      | 1.18 (1.19) | 0.80 (0.22) | 0.77 (-1.23) | 1.01 (0.53) | 0.94 (0.36) |

---

**Table S5. Free energies for all calculated species at different atomic spacings**

| Species      | $E_{\text{elect}}$ | Thermo | G (eV)    |
|--------------|--------------------|--------|-----------|
| Cu(111)_5Å   | -207.5139          | 0.0000 | -207.5139 |
| Cu(111)_6Å   | -206.9274          | 0.0000 | -206.9274 |
| Cu(111)_7Å   | -206.6909          | 0.0000 | -206.6909 |
| Cu(111)_8Å   | -206.5698          | 0.0000 | -206.5698 |
| Cu(111)_bare | -103.1835          | 0.0000 | -103.1835 |
| Cu_CO_5Å     | -223.6380          | 0.1115 | -223.5265 |
| Cu_CO_6Å     | -223.1768          | 0.1116 | -223.0652 |
| Cu_CO_7Å     | -222.9100          | 0.1106 | -222.7994 |
| Cu_CO_8Å     | -222.7590          | 0.1114 | -222.6476 |
| Cu_CO_bare   | -119.3388          | 0.1049 | -119.2339 |
| Cu_COOH_5Å   | -234.4579          | 0.4830 | -233.9749 |
| Cu_COOH_6Å   | -233.8338          | 0.4468 | -233.3870 |
| Cu_COOH_7Å   | -233.4803          | 0.4790 | -233.0013 |
| Cu_COOH_8Å   | -233.3011          | 0.4868 | -232.8143 |
| Cu_COOH_bare | -129.8820          | 0.4974 | -129.3846 |
| Cu_NO_5Å     | -221.6857          | 0.0979 | -221.5878 |
| Cu_NO_6Å     | -221.0828          | 0.1037 | -220.9791 |



|                                |           |        |           |
|--------------------------------|-----------|--------|-----------|
| Cu_NO_7Å                       | -220.8394 | 0.1053 | -220.7341 |
| Cu_NO_8Å                       | -220.6957 | 0.1066 | -220.5891 |
| Cu_NO_bare                     | -117.2793 | 0.1060 | -117.1733 |
| Cu_NOH_5Å                      | -225.2215 | 0.3509 | -224.8706 |
| Cu_NOH_6Å                      | -224.6540 | 0.3519 | -224.3021 |
| Cu_NOH_7Å                      | -224.3295 | 0.3974 | -223.9320 |
| Cu_NOH_8Å                      | -224.1658 | 0.3894 | -223.7764 |
| Cu_NOH_bare                    | -120.7362 | 0.3825 | -120.3536 |
| Cu_N_5Å                        | -214.9030 | 0.0745 | -214.8285 |
| Cu_N_6Å                        | -214.3389 | 0.0761 | -214.2628 |
| Cu_N_7Å                        | -214.1289 | 0.0770 | -214.0518 |
| Cu_N_8Å                        | -214.0034 | 0.0772 | -213.9262 |
| Cu_N_bare                      | -110.6066 | 0.0763 | -110.5303 |
| Cu_NH_5Å                       | -219.9542 | 0.3609 | -219.5933 |
| Cu_NH_6Å                       | -219.3451 | 0.3657 | -218.9793 |
| Cu_NH_7Å                       | -219.1176 | 0.3672 | -218.7504 |
| Cu_NH_8Å                       | -218.9838 | 0.3670 | -218.6167 |
| Cu_NH_bare                     | -115.5712 | 0.3631 | -115.2082 |
| Cu_NH <sub>2</sub> _5Å         | -224.0270 | 0.6380 | -223.3890 |
| Cu_NH <sub>2</sub> _6Å         | -223.3959 | 0.6463 | -222.7496 |
| Cu_NH <sub>2</sub> _7Å         | -223.0951 | 0.6493 | -222.4457 |
| Cu_NH <sub>2</sub> _8Å         | -222.9485 | 0.6483 | -222.3002 |
| Cu_NH <sub>2</sub> _bare       | -119.5221 | 0.6457 | -118.8764 |
| Cu_NO+CO <sub>2</sub> _TS_5Å   | -244.2500 | 0.2600 | -243.9900 |
| Cu_NO+CO <sub>2</sub> _TS_6Å   | -243.6500 | 0.2600 | -243.3900 |
| Cu_NO+CO <sub>2</sub> _TS_7Å   | -243.3807 | 0.2800 | -243.1000 |
| Cu_NO+CO <sub>2</sub> _TS_8Å   | -243.1514 | 0.2912 | -242.8600 |
| Cu_NO+CO <sub>2</sub> _TS_bare | -139.6572 | 0.2933 | -139.3639 |

|                                 |           |        |           |
|---------------------------------|-----------|--------|-----------|
| Cu_NO+COOH_TS_5Å                | -247.7700 | 0.5800 | -247.1900 |
| Cu_NO+COOH_TS_6Å                | -246.9100 | 0.5400 | -246.3700 |
| Cu_NO+COOH_TS_7Å                | -246.4600 | 0.5539 | -245.9100 |
| Cu_NO+COOH_TS_8Å                | -246.2500 | 0.5600 | -245.6900 |
| Cu_NO+COOH_TS_bare              | -142.8392 | 0.5862 | -142.2530 |
| Cu_NO+CO_TS_5Å                  | -236.9000 | 0.1500 | -236.7500 |
| Cu_NO+CO_TS_6Å                  | -236.3100 | 0.1800 | -236.1300 |
| Cu_NO+CO_TS_7Å                  | -235.9157 | 0.1982 | -235.7200 |
| Cu_NO+CO_TS_8Å                  | -235.7100 | 0.1900 | -235.5200 |
| Cu_NO+CO_TS_bare                | -132.2286 | 0.1888 | -132.0398 |
| Cu_NOH+CO <sub>2</sub> _TS_5Å   | -247.6900 | 0.5100 | -247.1800 |
| Cu_NOH+CO <sub>2</sub> _TS_6Å   | -247.4000 | 0.5600 | -246.8400 |
| Cu_NOH+CO <sub>2</sub> _TS_7Å   | -247.0950 | 0.5663 | -246.5300 |
| Cu_NOH+CO <sub>2</sub> _TS_8Å   | -246.8700 | 0.5700 | -246.3000 |
| Cu_NOH+CO <sub>2</sub> _TS_bare | -143.3922 | 0.5584 | -142.8339 |
| Cu_NOH+COOH_TS_5Å               | -251.3400 | 0.8600 | -250.4800 |
| Cu_NOH+COOH_TS_6Å               | -250.5900 | 0.8600 | -249.7200 |
| Cu_NOH+COOH_TS_7Å               | -250.0829 | 0.8991 | -249.1800 |
| Cu_NOH+COOH_TS_8Å               | -249.8600 | 0.9100 | -248.9500 |
| Cu_NOH+COOH_TS_bare             | -146.4111 | 0.8983 | -145.5127 |
| Cu_NOH+CO_TS_5Å                 | -240.5100 | 0.4700 | -240.0300 |
| Cu_NOH+CO_TS_6Å                 | -240.1000 | 0.5200 | -239.5900 |
| Cu_NOH+CO_TS_7Å                 | -239.7598 | 0.5244 | -239.2400 |
| Cu_NOH+CO_TS_8Å                 | -239.5700 | 0.5200 | -239.0500 |
| Cu_NOH+CO_TS_bare               | -136.1247 | 0.5160 | -135.6086 |
| Cu_N+CO <sub>2</sub> _TS_5Å     | -238.0900 | 0.2800 | -237.8100 |
| Cu_N+CO <sub>2</sub> _TS_6Å     | -237.7200 | 0.2500 | -237.4700 |
| Cu_N+CO <sub>2</sub> _TS_7Å     | -237.3850 | 0.2551 | -237.1300 |

|                                            |           |        |           |
|--------------------------------------------|-----------|--------|-----------|
| Cu_N+CO <sub>2</sub> _TS_8Å                | -237.1648 | 0.2581 | -236.9100 |
| Cu_N+CO <sub>2</sub> _TS_bare              | -133.4327 | 0.2332 | -133.1995 |
| Cu_N+COOH_TS_5Å                            | -241.3900 | 0.5700 | -240.8200 |
| Cu_N+COOH_TS_6Å                            | -240.7700 | 0.5400 | -240.2300 |
| Cu_N+COOH_TS_7Å                            | -240.3732 | 0.5773 | -239.8000 |
| Cu_N+COOH_TS_8Å                            | -240.1900 | 0.5900 | -239.6100 |
| Cu_N+COOH_TS_bare                          | -136.6652 | 0.5866 | -136.0786 |
| Cu_N+CO_TS_5Å                              | -230.3100 | 0.1600 | -230.1500 |
| Cu_N+CO_TS_6Å                              | -229.8800 | 0.1700 | -229.7100 |
| Cu_N+CO_TS_7Å                              | -229.5900 | 0.1600 | -229.4300 |
| Cu_N+CO_TS_8Å                              | -229.4300 | 0.1700 | -229.2600 |
| Cu_N+CO_TS_bare                            | -125.9744 | 0.1659 | -125.8084 |
| Cu_NH+CO <sub>2</sub> _TS_5Å               | -242.4300 | 0.5000 | -241.9300 |
| Cu_NH+CO <sub>2</sub> _TS_6Å               | -242.2100 | 0.5300 | -241.6900 |
| Cu_NH+CO <sub>2</sub> _TS_7Å               | -241.8917 | 0.5336 | -241.3600 |
| Cu_NH+CO <sub>2</sub> _TS_8Å               | -241.6800 | 0.5400 | -241.1400 |
| Cu_NH+CO <sub>2</sub> _TS_bare             | -138.2072 | 0.5420 | -137.6653 |
| Cu_NH+COOH_TS_5Å                           | -245.9500 | 0.8300 | -245.1200 |
| Cu_NH+COOH_TS_6Å                           | -245.3500 | 0.8200 | -244.5200 |
| Cu_NH+COOH_TS_7Å                           | -244.9247 | 0.8557 | -244.0700 |
| Cu_NH+COOH_TS_8Å                           | -244.6900 | 0.8600 | -243.8300 |
| Cu_NH+COOH_TS_bare                         | -141.1727 | 0.8525 | -140.3202 |
| Cu_NH+CO_TS_5Å                             | -235.1100 | 0.4400 | -234.6700 |
| Cu_NH+CO_TS_6Å                             | -234.6100 | 0.4500 | -234.1600 |
| Cu_NH+CO_TS_7Å                             | -234.3100 | 0.4500 | -233.8600 |
| Cu_NH+CO_TS_8Å                             | -234.1400 | 0.4500 | -233.6900 |
| Cu_NH+CO_TS_bare                           | -130.7049 | 0.4524 | -130.2526 |
| Cu_NH <sub>2</sub> +CO <sub>2</sub> _TS_5Å | -246.6900 | 0.7900 | -245.9000 |

|                                              |           |        |           |
|----------------------------------------------|-----------|--------|-----------|
| Cu_NH <sub>2</sub> +CO <sub>2</sub> _TS_6Å   | -246.2000 | 0.8000 | -245.4100 |
| Cu_NH <sub>2</sub> +CO <sub>2</sub> _TS_7Å   | -245.8310 | 0.8086 | -245.0200 |
| Cu_NH <sub>2</sub> +CO <sub>2</sub> _TS_8Å   | -245.6100 | 0.8100 | -244.8000 |
| Cu_NH <sub>2</sub> +CO <sub>2</sub> _TS_bare | -142.1317 | 0.7695 | -141.3622 |
| Cu_NH <sub>2</sub> +COOH_TS_5Å               | -250.0100 | 1.0900 | -248.9300 |
| Cu_NH <sub>2</sub> +COOH_TS_6Å               | -249.3100 | 1.0900 | -248.2200 |
| Cu_NH <sub>2</sub> +COOH_TS_7Å               | -248.8600 | 1.1300 | -247.7300 |
| Cu_NH <sub>2</sub> +COOH_TS_8Å               | -248.6600 | 1.1300 | -247.5200 |
| Cu_NH <sub>2</sub> +COOH_TS_bare             | -145.2206 | 1.1301 | -144.0905 |
| Cu_NH <sub>2</sub> +CO_TS_5Å                 | -239.0300 | 0.6600 | -238.3700 |
| Cu_NH <sub>2</sub> +CO_TS_6Å                 | -238.6100 | 0.6800 | -237.9300 |
| Cu_NH <sub>2</sub> +CO_TS_7Å                 | -238.3000 | 0.6900 | -237.6100 |
| Cu_NH <sub>2</sub> +CO_TS_8Å                 | -238.1100 | 0.6900 | -237.4200 |
| Cu_NH <sub>2</sub> +CO_TS_bare               | -134.6736 | 0.6849 | -133.9887 |
| Cu_NO+CO <sub>2</sub> _product_5Å            | -246.0000 | 0.4274 | -245.2500 |
| Cu_NO+CO <sub>2</sub> _product_6Å            | -244.6100 | 0.3800 | -244.2300 |
| Cu_NO+CO <sub>2</sub> _product_7Å            | -243.9000 | 0.3800 | -243.5200 |
| Cu_NO+CO <sub>2</sub> _product_8Å            | -243.6000 | 0.3700 | -243.2400 |
| Cu_NO+CO <sub>2</sub> _product_bare          | -139.9545 | 0.3540 | -139.6004 |
| Cu_NO+COOH_product_5Å                        | -249.0000 | 0.6420 | -248.2600 |
| Cu_NO+COOH_product_6Å                        | -248.5700 | 0.6900 | -247.8800 |
| Cu_NO+COOH_product_7Å                        | -248.3200 | 0.7100 | -247.6100 |
| Cu_NO+COOH_product_8Å                        | -248.0900 | 0.7200 | -247.3700 |
| Cu_NO+COOH_product_bare                      | -144.5613 | 0.7146 | -143.8467 |
| Cu_NO+CO_product_5Å                          | -238.0000 | 0.2588 | -237.6900 |
| Cu_NO+CO_product_6Å                          | -236.4000 | 0.2000 | -236.2000 |
| Cu_NO+CO_product_7Å                          | -235.9500 | 0.2100 | -235.7400 |
| Cu_NO+CO_product_8Å                          | -235.9500 | 0.1900 | -235.7600 |

|                                      |           |        |           |
|--------------------------------------|-----------|--------|-----------|
| Cu_NO+CO_product_bare                | -132.2386 | 0.2060 | -132.0326 |
| Cu_NOH+CO <sub>2</sub> _product_5Å   | -250.0000 | 0.7142 | -248.8700 |
| Cu_NOH+CO <sub>2</sub> _product_6Å   | -248.7800 | 0.6500 | -248.1300 |
| Cu_NOH+CO <sub>2</sub> _product_7Å   | -248.1300 | 0.6700 | -247.4600 |
| Cu_NOH+CO <sub>2</sub> _product_8Å   | -247.8900 | 0.6800 | -247.2100 |
| Cu_NOH+CO <sub>2</sub> _product_bare | -144.3481 | 0.6713 | -143.6769 |
| Cu_NOH+COOH_product_5Å               | -252.0000 | 0.9482 | -250.8800 |
| Cu_NOH+COOH_product_6Å               | -252.2400 | 0.9600 | -251.2800 |
| Cu_NOH+COOH_product_7Å               | -252.0900 | 0.9900 | -251.1000 |
| Cu_NOH+COOH_product_8Å               | -251.8600 | 1.0000 | -250.8600 |
| Cu_NOH+COOH_product_bare             | -148.2915 | 0.9904 | -147.3011 |
| Cu_NOH+CO_product_5Å                 | -241.0000 | 0.5173 | -240.5300 |
| Cu_NOH+CO_product_6Å                 | -240.6900 | 0.5200 | -240.1800 |
| Cu_NOH+CO_product_7Å                 | -240.3000 | 0.5500 | -239.7600 |
| Cu_NOH+CO_product_8Å                 | -240.0800 | 0.5500 | -239.5300 |
| Cu_NOH+CO_product_bare               | -136.7453 | 0.5592 | -136.1861 |
| Cu_N+CO <sub>2</sub> _product_5Å     | -240.0000 | 0.3600 | -239.9700 |
| Cu_N+CO <sub>2</sub> _product_6Å     | -238.6100 | 0.2900 | -238.3100 |
| Cu_N+CO <sub>2</sub> _product_7Å     | -237.9700 | 0.3100 | -237.6600 |
| Cu_N+CO <sub>2</sub> _product_8Å     | -237.6800 | 0.3100 | -237.3700 |
| Cu_N+CO <sub>2</sub> _product_bare   | -134.0787 | 0.2836 | -133.7951 |
| Cu_N+COOH_product_5Å                 | -243.0000 | 0.5954 | -242.3900 |
| Cu_N+COOH_product_6Å                 | -242.6700 | 0.6300 | -242.0400 |
| Cu_N+COOH_product_7Å                 | -242.4400 | 0.6400 | -241.8000 |
| Cu_N+COOH_product_8Å                 | -242.2100 | 0.6500 | -241.5600 |
| Cu_N+COOH_product_bare               | -138.6436 | 0.6428 | -138.0009 |
| Cu_N+CO_product_5Å                   | -232.0000 | 0.1848 | -232.0200 |
| Cu_N+CO_product_6Å                   | -231.9600 | 0.2000 | -231.7600 |

|                                                   |           |        |           |
|---------------------------------------------------|-----------|--------|-----------|
| Cu_N+CO_product_7Å                                | -231.7200 | 0.2100 | -231.5100 |
| Cu_N+CO_product_8Å                                | -231.5100 | 0.2000 | -231.3100 |
| Cu_N+CO_product_bare                              | -128.0121 | 0.2016 | -127.8105 |
| Cu_NH+CO <sub>2</sub> _product_5Å                 | -244.0000 | 0.6477 | -243.4800 |
| Cu_NH+CO <sub>2</sub> _product_6Å                 | -243.3100 | 0.6200 | -242.6900 |
| Cu_NH+CO <sub>2</sub> _product_7Å                 | -242.7700 | 0.6600 | -242.1100 |
| Cu_NH+CO <sub>2</sub> _product_8Å                 | -242.5300 | 0.6600 | -241.8800 |
| Cu_NH+CO <sub>2</sub> _product_bare               | -139.0001 | 0.6413 | -138.3589 |
| Cu_NH+COOH_product_5Å                             | -247.0000 | 0.8898 | -246.2200 |
| Cu_NH+COOH_product_6Å                             | -247.0500 | 0.9300 | -246.1100 |
| Cu_NH+COOH_product_7Å                             | -246.9200 | 0.9500 | -245.9700 |
| Cu_NH+COOH_product_8Å                             | -246.6700 | 0.9500 | -245.7100 |
| Cu_NH+COOH_product_bare                           | -142.9512 | 0.9191 | -142.0322 |
| Cu_NH+CO_product_5Å                               | -236.0000 | 0.5182 | -235.8700 |
| Cu_NH+CO_product_6Å                               | -235.1700 | 0.4500 | -234.7200 |
| Cu_NH+CO_product_7Å                               | -234.8000 | 0.4600 | -234.3400 |
| Cu_NH+CO_product_8Å                               | -234.6200 | 0.4600 | -234.1600 |
| Cu_NH+CO_product_bare                             | -131.1861 | 0.4588 | -130.7273 |
| Cu_NH <sub>2</sub> +CO <sub>2</sub> _product_5Å   | -248.0000 | 0.9266 | -246.8500 |
| Cu_NH <sub>2</sub> +CO <sub>2</sub> _product_6Å   | -247.1200 | 0.9200 | -246.2000 |
| Cu_NH <sub>2</sub> +CO <sub>2</sub> _product_7Å   | -246.5800 | 0.9200 | -245.6600 |
| Cu_NH <sub>2</sub> +CO <sub>2</sub> _product_8Å   | -246.3500 | 0.9200 | -245.4300 |
| Cu_NH <sub>2</sub> +CO <sub>2</sub> _product_bare | -142.8075 | 0.9154 | -141.8922 |
| Cu_NH <sub>2</sub> +COOH_product_5Å               | -251.0000 | 1.1717 | -249.8800 |
| Cu_NH <sub>2</sub> +COOH_product_6Å               | -250.6500 | 1.1400 | -249.5100 |
| Cu_NH <sub>2</sub> +COOH_product_7Å               | -250.4100 | 1.1600 | -249.2500 |
| Cu_NH <sub>2</sub> +COOH_product_8Å               | -250.1000 | 1.1600 | -248.9400 |
| Cu_NH <sub>2</sub> +COOH_product_bare             | -146.5496 | 1.1749 | -145.3747 |

|                                     |           |        |           |
|-------------------------------------|-----------|--------|-----------|
| Cu_NH <sub>2</sub> +CO_product_5Å   | -240.0000 | 0.7347 | -238.8800 |
| Cu_NH <sub>2</sub> +CO_product_6Å   | -239.3900 | 0.7700 | -238.6200 |
| Cu_NH <sub>2</sub> +CO_product_7Å   | -239.0800 | 0.7900 | -238.2900 |
| Cu_NH <sub>2</sub> +CO_product_8Å   | -238.8400 | 0.7900 | -238.0500 |
| Cu_NH <sub>2</sub> +CO_product_bare | -135.3388 | 0.7710 | -134.5678 |
| Cu_H_6Å                             | -210.7600 | 0.1700 | -210.5900 |
| Cu_H_7Å                             | -210.5300 | 0.1700 | -210.3600 |
| Cu_H_8Å                             | -210.4100 | 0.1700 | -210.2400 |

**Table S6. Free energies for each isolated molecule calculated using VASP for electronic energy and Gaussian16 for thermo-correction**

| Species         | E <sub>elect</sub> | Thermo  | G (eV)   |
|-----------------|--------------------|---------|----------|
| CO <sub>2</sub> | -23.0097           | -0.0094 | -23.2654 |
| H <sub>2</sub>  | -6.7616            | -0.0016 | -6.8041  |



## References

- 1 Y. Huang, R. Yang, C. Wang, N. Meng, Y. Shi, Y. Yu and B. Zhang, *ACS Energy Lett.*, 2022, **7**, 284-291.
- 2 M. Shibata and N. Furuya, *J. Electroanal. Chem.*, 2001, **507**, 177-184.
- 3 D. Saravanakumar, J. Song, S. Lee, N. H. Hur and W. Shin, *ChemSusChem*, 2017, **10**, 3999-4003.
- 4 C. Lv, L. Zhong, H. Liu, Z. Fang, C. Yan, M. Chen, Y. Kong, C. Lee, D. Liu, S. Li, J. Liu, L. Song, G. Chen, Q. Yan and G. Yu, *Nat. Sustain.*, 2021, **4**, 868-876.
- 5 H. Wang, Y. Jiang, S. Li, F. Gou, X. Liu, Y. Jiang, W. Luo, W. Shen, R. He and M. Li, *Appl. Catal. B*, 2022, **318**, 121819.
- 6 J. Leverett, T. Tran-Phu, J. A. Yuwono, P. Kumar, C. Kim, Q. Zhai, C. Han, J. Qu, J. Cairney, A. N. Simonov, R. K. Hocking, L. Dai, R. Daiyan and R. Amal, *Adv. Energy Mater.*, 2022, **12**, 2201500.
- 7 X. Zhang, X. Zhu, S. Bo, C. Chen, M. Qiu, X. Wei, N. He, C. Xie, W. Chen, J. Zheng, P. Chen, S. P. Jiang, Y. Li, Q. Liu and S. Wang, *Nat. Commun.*, 2022, **13**, 5337.
- 8 S. Zhang, J. Geng, Z. Zhao, M. Jin, W. Li, Y. Ye, K. Li, G. Wang, Y. Zhang, H. Yin, H. Zhang and H. Zhao, *EES Catal.*, 2023, DOI: 10.1039/D2EY00038E.
- 9 N. Cao, Y. Quan, A. Guan, C. Yang, Y. Ji, L. Zhang and G. Zheng, *J. Colloid Interface Sci.*, 2020, **577**, 109-114.
- 10 Y. Feng, H. Yang, Y. Zhang, X. Huang, L. Li, T. Cheng and Q. Shao, *Nano Lett.*, 2020, **20**, 8282-8289.
- 11 N. Meng, Y. Huang, Y. Liu, Y. Yu and B. Zhang, *Cell Rep. Phys. Sci.*, 2021, **2**, 100378.
- 12 D. B. Kayan and F. Köleli, *Appl. Catal. B*, 2016, **181**, 88-93.
- 13 C. Chen, X. Zhu, X. Wen, Y. Zhou, L. Zhou, H. Li, L. Tao, Q. Li, S. Du, T. Liu, D. Yan, C. Xie, Y. Zou, Y. Wang, R. Chen, J. Huo, Y. Li, J. Cheng, H. Su, X. Zhao, W. Cheng, Q. Liu, H. Lin, J. Luo, J. Chen, M. Dong, K. Cheng, C. Li and S. Wang, *Nat. Chem.*, 2020, **12**, 717-724.
- 14 M. Yuan, J. Chen, Y. Bai, Z. Liu, J. Zhang, T. Zhao, Q. Wang, S. Li, H. He and G. Zhang, *Angew. Chem., Int. Ed.*, 2021, **60**, 10910-10918.
- 15 M. Yuan, J. Chen, Y. Bai, Z. Liu, J. Zhang, T. Zhao, Q. Shi, S. Li, X. Wang and G. Zhang, *Chem. Sci.*, 2021, **12**, 6048-6058.
- 16 M. Yuan, J. Chen, Y. Xu, R. Liu, T. Zhao, J. Zhang, Z. Ren, Z. Liu, C. Streb, H. He, C. Yang, S. Zhang and G. Zhang, *Energy Environ. Sci.*, 2021, **14**, 6605-6615.
- 17 M. Yuan, H. Zhang, Y. Xu, R. Liu, R. Wang, T. Zhao, J. Zhang, Z. Liu, H. He, C. Yang, S. Zhang and G. Zhang, *Chem. Catal.*, 2022, **2**, 309-320.
